# Supplementary material for: How does overall hospital satisfaction relate to patient experience with nursing care? a cross-sectional study in China
Source: PubMed Central journal article supplement — BMJ Open. 2022 Jan 17;12(1):e053899. doi: 10.1136/bmjopen-2021-053899 (PMC8765024; doi:10.1136/bmjopen-2021-053899), 2022-01-17
Supplement: bmjopen-2021-053899.draft_revisions.pdf [file bmjopen-2021-053899.draft_revisions.pdf]

# BMJ Open

BMJ Open is committed to open peer review. As part of this commitment we make the peer review history of every article we publish publicly available.

When an article is published we post the peer reviewers' comments and the authors' responses online. We also post the versions of the paper that were used during peer review. These are the versions that the peer review comments apply to.

The versions of the paper that follow are the versions that were submitted during the peer review process. They are not the versions of record or the final published versions. They should not be cited or distributed as the published version of this manuscript.

BMJ Open is an open access journal and the full, final, typeset and author-corrected version of record of the manuscript is available on our site with no access controls, subscription charges or pay-per-view fees (<http://bmjopen.bmj.com>).

If you have any questions on BMJ Open's open peer review process please email [info.bmjopen@bmj.com](mailto:info.bmjopen@bmj.com)

# BMJ Open

## How does overall hospital satisfaction relate to patient experience with nursing care? a cross-sectional study

|                               |                                                                                                                                                                                                                                                                                                                                                                                                                                                                                                                                                                                                                                                                                                                    |
|-------------------------------|--------------------------------------------------------------------------------------------------------------------------------------------------------------------------------------------------------------------------------------------------------------------------------------------------------------------------------------------------------------------------------------------------------------------------------------------------------------------------------------------------------------------------------------------------------------------------------------------------------------------------------------------------------------------------------------------------------------------|
| Journal:                      | <i>BMJ Open</i>                                                                                                                                                                                                                                                                                                                                                                                                                                                                                                                                                                                                                                                                                                    |
| Manuscript ID                 | bmjopen-2021-053899                                                                                                                                                                                                                                                                                                                                                                                                                                                                                                                                                                                                                                                                                                |
| Article Type:                 | Original research                                                                                                                                                                                                                                                                                                                                                                                                                                                                                                                                                                                                                                                                                                  |
| Date Submitted by the Author: | 02-Jun-2021                                                                                                                                                                                                                                                                                                                                                                                                                                                                                                                                                                                                                                                                                                        |
| Complete List of Authors:     | Chen, Xiao; Zhongshan Hospital Fudan University, Nursing department<br>Zhang, Yuxia; Zhongshan Hospital Fudan University, Department of Nursing<br>Qin, Wei; Zhongshan Hospital Fudan University, Department of Nursing<br>Yu, Zhenghong; Zhongshan Hospital Fudan University, Department of Surgery<br>Yu, JingXian; Zhongshan Hospital Fudan University, Department of Liver Disease<br>Lin, Ying; Zhongshan Hospital Fudan University, Department of Cardiology<br>Li, XiaoRong; Zhongshan Hospital Fudan University, Department of Internal medicine<br>Zheng, Zheng; Zhongshan Hospital Fudan University, Department of Respiratory<br>Wang, Ying; Zhongshan Hospital Fudan University, Department of Nursing |
| Keywords:                     | Quality in health care < HEALTH SERVICES ADMINISTRATION & MANAGEMENT, HEALTH SERVICES ADMINISTRATION & MANAGEMENT, Health & safety < HEALTH SERVICES ADMINISTRATION & MANAGEMENT                                                                                                                                                                                                                                                                                                                                                                                                                                                                                                                                   |
|                               |                                                                                                                                                                                                                                                                                                                                                                                                                                                                                                                                                                                                                                                                                                                    |

SCHOLARONE™  
Manuscripts

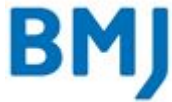

I, the Submitting Author has the right to grant and does grant on behalf of all authors of the Work (as defined in the below author licence), an exclusive licence and/or a non-exclusive licence for contributions from authors who are: i) UK Crown employees; ii) where BMJ has agreed a CC-BY licence shall apply, and/or iii) in accordance with the terms applicable for US Federal Government officers or employees acting as part of their official duties; on a worldwide, perpetual, irrevocable, royalty-free basis to BMJ Publishing Group Ltd ("BMJ") its licensees and where the relevant Journal is co-owned by BMJ to the co-owners of the Journal, to publish the Work in this journal and any other BMJ products and to exploit all rights, as set out in our [licence](#).

The Submitting Author accepts and understands that any supply made under these terms is made by BMJ to the Submitting Author unless you are acting as an employee on behalf of your employer or a postgraduate student of an affiliated institution which is paying any applicable article publishing charge ("APC") for Open Access articles. Where the Submitting Author wishes to make the Work available on an Open Access basis (and intends to pay the relevant APC), the terms of reuse of such Open Access shall be governed by a Creative Commons licence – details of these licences and which [Creative Commons](#) licence will apply to this Work are set out in our licence referred to above.

Other than as permitted in any relevant BMJ Author's Self Archiving Policies, I confirm this Work has not been accepted for publication elsewhere, is not being considered for publication elsewhere and does not duplicate material already published. I confirm all authors consent to publication of this Work and authorise the granting of this licence.

**How does overall hospital satisfaction relate to patient experience with nursing care? a cross-sectional study**

**Xiao CHEN, Yuxia ZHANG, Wei QIN, Zhenghong YU, Jingxian YU, Ying LIN, Xiaorong LI, Zheng ZHENG, Ying WANG**

**Xiao CHEN, MD, RN**, Department of Nursing, Zhongshan Hospital of Fudan University, Shanghai, People's Republic of China. Email: [chenxiao1992@aliyun.com](mailto:chenxiao1992@aliyun.com). Postal code: 200032

**Yuxia ZHANG, PhD, RN, FAAN**, Department of Nursing, Zhongshan Hospital of Fudan University, Shanghai, People's Republic of China. Email: [zhang.yuxia@zs-hospital.sh.cn](mailto:zhang.yuxia@zs-hospital.sh.cn). Postal code: 200032

**Wei QIN, MD, RN**, Department of Internal Medicine, Zhongshan Hospital of Fudan University, Shanghai, People's Republic of China. Email: [qin.wei@zs-hospital.sh.cn](mailto:qin.wei@zs-hospital.sh.cn). Postal code: 200032

**Zhenghong YU, BSN, RN**, Department of Surgery, Zhongshan Hospital of Fudan University, Shanghai, People's Republic of China. Email: [yu.zhenghong@zs-hospital.sh.cn](mailto:yu.zhenghong@zs-hospital.sh.cn). Postal code: 200032

**Jingxian YU, BSN, RN**, Department of Liver Disease, Zhongshan Hospital of Fudan University, Shanghai, People's Republic of China. Email: [yu.jingxian@zs-hospital.sh.cn](mailto:yu.jingxian@zs-hospital.sh.cn). Postal code: 200032

**Ying LIN, BSN, RN**, Department of Heart Disease, Zhongshan Hospital of Fudan University, Shanghai, People's Republic of China. Email: [lin.ying@zs-hospital.sh.cn](mailto:lin.ying@zs-hospital.sh.cn). Postal code: 200032

**Xiaorong LI, BSN, RN**, Department of Internal Medicine, Zhongshan Hospital of Fudan University, Shanghai, People's Republic of China. Email: [li.xiaorong@zs-hospital.sh.cn](mailto:li.xiaorong@zs-hospital.sh.cn). Postal code: 200032

**Zheng ZHENG, BSN, RN**, Department of Respiratory, Zhongshan Hospital of Fudan University, Shanghai, People's Republic of China. Email: [zheng.zheng@zs-hospital.sh.cn](mailto:zheng.zheng@zs-hospital.sh.cn). Postal code: 200032

**Ying WANG, BSN, RN**, Department of geriatrics, Zhongshan Hospital of Fudan University, Shanghai, People's Republic of China. Email:

wang.ying1@zs-hospital.sh.cn. Postal code: 200032

**Corresponding Author:** Yuxia Zhang, RN, PhD, FAAN, Nursing Department, Zhongshan Hospital of Fudan University. Address: No.180, Fenglin road, Shanghai, People's Republic of China. Telephone: +86 13816881925. Fax number: 64041990. Email: zhang.yuxia@zs-hospital.sh.cn.

## Abstract

**Objective:** To determine how factors related to nursing practices influence patient satisfaction with overall hospital services.

**Design:** This was a cross-sectional study.

**Setting:** Inpatients were consecutively recruited at the national hospital (with 2000 beds) in Shanghai, China.

**Participants:** The inclusion criteria were as follows: (1) hospitalized for 2 days or more; (2) able to read and understand Chinese; and (3) aged 18 years old or above. Patients with mental health problems were excluded. 756 patient surveys distributed among 36 wards were analyzed. The mean age of participants in the study was 57.7 (SD=14.5) and ranged from 18-80 years. Most participants were male (61.5%) and ever married (94.6%).

**Primary and secondary outcome measures:** Patient experience with nursing care was measured by the self-designed questionnaire under the guidance of the NHS Patient Experience Framework developed by the NHS National Quality Board (NQB), the overall patient satisfaction question was measured with a ten-point response option ranging from 1-10.

**Results:** A linear relationship between the patient experience with nursing care and overall patient satisfaction was observed after adjusting for age, sex, household monthly income per capita, literacy level, residence, medical insurance, length of hospital stay, number of admissions within one year, and primary diagnosis. The patient experience with nursing care was significantly associated with overall satisfaction in the crude model and in the adjusted models. Even after adjusting for 6 sociodemographic and 3 disease-related factors, the patient experience with nursing

care explained 34.9% of the variation in overall patient satisfaction.

**Conclusions:** This study showed that patient experience with nursing care was an important predictor for overall patient satisfaction.

**Key words:** Patient satisfaction; Patient experience; Nurse roles; Health services research

### **Strengths and limitations of this study**

- This study used a valid and specific questionnaire of patient experience with nursing care made by patient interviews, literature analysis, and expert consultation to investigate patient experience with nursing care.
- This study quantitatively analyzed the impact of nursing practice on overall patient satisfaction.
- This study first surveyed patient experience with nursing care systematically and comprehensively in China
- This was a single-center study and our findings therefore may not be generalized.
- This study didn't include patients in outpatient department and emergency department because the questionnaire was specifically developed for inpatients.

### **1 Introduction**

In the age of patient-centered care, as value-based care expands, patient satisfaction has become a key indicator in assessing healthcare quality and hospital performance [1] and is being used more frequently to determine hospital performance and hospital reimbursement [2, 3]. Patients who are satisfied with the healthcare system are more willing to comply with medical orders and treatments [4], are more likely to return to the healthcare organization for future care, and are more likely to recommend healthcare services to their family members and friends [5].

Recognizing factors that influence overall patient satisfaction will help improve medical care. A large body of research has identified the factors that account for the variations in patient satisfaction [6]. However, such studies have largely focused on patient characteristics, such as age [7], gender [8], race/ethnicity [9], financial [10] and health status [11], and organizational factors [12]; additionally, these studies have

1  
2  
3  
4 inconsistent findings and explained only a small fraction of the variance in patient  
5  
6 satisfaction.

7  
8 In recent years, patient experience has been increasingly used to evaluate the  
9  
10 quality of care [10, 13]. Patients' direct experience of the care process can not only  
11  
12 provide invaluable insight for daily care and is frequently cited in health policy  
13  
14 globally [14] but also significantly impact patient satisfaction with the health care  
15  
16 system [15]. Most current literature has explored the relationship between the overall  
17  
18 patient experience and patient satisfaction with the health care system [16, 17].

19  
20 Nurses are a vital and central part of the health care system [18], accounting for  
21  
22 nearly half of the global health workforce and spending more time with patients than  
23  
24 any other medical professionals [19]. In theory, patient experience with nursing care,  
25  
26 as a process indicator, reflects the interpersonal aspects of care received and has an  
27  
28 important impact on overall satisfaction with hospital care [20, 21]. In the study of  
29  
30 Bjertnaes [17], thirteen variables were significantly associated with overall patient  
31  
32 satisfaction with hospitals, and the results of the regression model showed that the  
33  
34 most important predictor of patient satisfaction with hospitals was patient experiences  
35  
36 with nursing care. Similarly, Schmidt found that the perception of nursing care  
37  
38 received was the only significant predictor of overall satisfaction with the hospital  
39  
40 experience [22].

41  
42 However, in terms of using these patient experience data to fully utilize nurses'  
43  
44 potential and to reshape nursing care, existing studies have not offered enough  
45  
46 feedback due to the low representation of nursing practices in these patient experience  
47  
48 surveys [16,17]. Most patient experience scales include a limited number of items  
49  
50 related to nursing and fail to provide thorough and detailed insight into nursing  
51  
52 practice from patients' perspectives. For instance, the study of Bjertnaes [17] included  
53  
54 only 4 items related to nursing care, and the study of Min [10] included only 2 items  
55  
56 related to nursing care.

57  
58 It is of note that factors such as patient characteristics and some organizational  
59  
60 characteristics are objective and cannot be influenced, whereas factors related to  
nursing services are amendable by providers to improve the quality of care. However,

1  
2  
3  
4 these patient experience with nursing care might be important when evaluating and  
5  
6 improving the quality of health services.

7  
8 We hypothesize that patient experience with nursing care accounts for a  
9  
10 considerable portion of the unexplained variation in health system satisfaction after  
11  
12 adjustments for the demographic profile, health and organizational factors with which  
13  
14 patient satisfaction is usually associated. Understanding the association between  
15  
16 patient experience with nursing care and patient satisfaction may help in utilizing the  
17  
18 results to improve nursing practice, resulting in better patient satisfaction. Therefore,  
19  
20 the purpose of this study was to determine how factors related to nursing practices  
21  
22 influence satisfaction among patients.

## 23 **2 Methods**

### 24 **2.1 Design**

25  
26 This study is a cross-sectional survey and is reported according to the 'The  
27  
28 Strengthening the Reporting of Observational Studies in Epidemiology (STROBE)  
29  
30 Statement for reporting observational studies' obtained from the EQUATOR Network  
31  
32 website [23].

### 33 **2.2 Setting**

34  
35 Inpatients were consecutively recruited from July 2020 to August 2020 in Zhongshan  
36  
37 Hospital of Fudan University, which is the largest academic hospital (with 2000 beds)  
38  
39 in Shanghai, China.

### 40 **2.3 Sample and participants**

41  
42 We calculated the sample size according to the requirements for factor analysis,  
43  
44 which demands that sample size be 5-10 times the number of factors. There were 33  
45  
46 items in the questionnaire and 22 patients and organizational characteristics.  
47  
48 Therefore, the sample size was required to be at least 660 with an estimated 20%  
49  
50 nonresponse rate. During the study period, a total of 767 inpatients were eligible to  
51  
52 participate in the study, 7 patients refused to participate (0.9%), and 4 patients'  
53  
54 questionnaires were incomplete (0.5%). Finally, 756 patients (98.6%) were analyzed.  
55  
56 The inclusion criteria were as follows: (1) hospitalized for 2 days or more; (2) able to  
57  
58 read and understand Chinese; and (3) aged 18 years old or above. Patients with mental  
59  
60



1  
2  
3  
4 health problems were excluded. Eligible patients were invited to participate in the  
5 study. When a patient showed an interest in participating, a recruitment letter  
6 explaining the aim, process, and ethical considerations of this study was sent to them.  
7  
8 To gain a broad and representative understanding of the patient experience, we varied  
9 the recruitment sites. A total of 36 wards were included, including 16 internal medical  
10 wards and 20 surgical wards.  
11  
12  
13  
14

## 15 **2.4 Measures**

### 16 **Patient characteristics**

17  
18 The following characteristics were collected: age, gender, ethics, religion, educational  
19 level, household monthly income per capita, family residence, medical assurance,  
20 primary caregiver, primary disease diagnosis, number of admissions within one year,  
21 and length of hospital stay. The section for disease diagnosis consisted of ten  
22 categories: (1) cardiovascular diseases, (2) pulmonary diseases, (3) diseases of the  
23 digestive system, (4) diseases of the musculoskeletal system, (5) endocrine/metabolic  
24 diseases, (6) neurological diseases, (7) diseases of ophthalmology, (8) diseases of the  
25 urinary system, (9) diseases of the hematological system, and (10) other diseases,  
26 including allergies.  
27  
28  
29  
30  
31  
32  
33  
34  
35

### 36 **Patient experience with nursing care**

37  
38 Patient experience with nursing care was measured by the inpatient experience of  
39 nursing care questionnaire, which was self-designed under the guidance of the NHS  
40 Patient Experience Framework developed by the NHS National Quality Board  
41 (NQB)[24]. After a scoping review of current research results concerning patients'  
42 expectations of good care, 15 semistructured in-depth interviews with 8 men and 7  
43 women were conducted to obtain insights into issues that are important to patients.  
44 Example questions are 'What aspects of nursing care do you feel are important?' and  
45 'What do you see as the nurses' role when you receive health services?'. The draft  
46 items of the questionnaire were generated by interviews and literature analysis. Then,  
47 to select the most suitable items to be retained in the questionnaire, the content  
48 validity of the items was evaluated by 15 experts in the fields of patient management  
49 and quality of care, and items were deleted if the content validity index was less than  
50  
51  
52  
53  
54  
55  
56  
57  
58  
59  
60

1  
2  
3  
4 0.8. Finally, we conducted a pilot survey and found the Cronbach's  $\alpha$  of the  
5 questionnaire was 0.84, and the split-half reliability was 0.75.  
6

7 The final questionnaire consisted of 33 items assessing 8 dimensions of patients'  
8 perception of nursing care: (1) Coordination of care (3 items), e.g., the process of  
9 admission. (2) Physical environment (3 items), e.g., the cleanliness of the ward. (3)  
10 Information and education (7 items), e.g., the information about how to conduct  
11 scientific lifestyles. (4) Emotional support (4 items), e.g., nurses' response to patients'  
12 anxiety and fear. (5) Technical competencies (2 items), e.g., proficiency in performing  
13 nursing procedures. (6) Monitoring the progress of diseases (4 items), e.g., monitoring  
14 the vital signs. (7) Responding requests (3 items), e.g., the waiting time after pressing  
15 the call button. (8) Patient safety and privacy protection (7 items), e.g., treating  
16 patients' information confidentially. Most of the items were assessed by a 5-point  
17 Likert scale ranging from "never" to "always", where 'never' = 1, 'occasionally' = 2,  
18 'sometimes' = 3, 'usually' = 4, and 'always' = 5. Response options ranged from  
19 "strongly disagree" and "strongly agree" for the admission process and discharge plan.  
20 For each item, the patients were offered the option of indicating whether it was *not*  
21 *relevant*. Each dimension score was determined by adding the scores of all items that  
22 corresponded to that dimension and dividing it by the number of items. The total  
23 inpatient experience score was the mean of all 8 dimension scores.  
24  
25  
26  
27  
28  
29  
30  
31  
32  
33  
34  
35  
36  
37  
38  
39

#### 40 **Patient satisfaction**

41 The overall patient satisfaction question was 'All in all, were you satisfied with the  
42 care and treatment you received at the hospital?', with a ten-point response option  
43 ranging from 1-10 (with 1 labeled "not at all satisfied" and 10 labeled "to a very large  
44 extent satisfied").  
45  
46  
47  
48  
49

#### 50 **2.5 Data Collection**

51 Eligible patients were invited to participate in the study. After informed consent was  
52 given, all data were obtained by interviews and the analysis of medical records and  
53 were collected by trained investigators. The timing of collecting the patients'  
54 feedback may affect their response to the questionnaires because some of them may  
55 worry that negative appraisals about their hospital experience and satisfaction would  
56  
57  
58  
59  
60

1  
2  
3  
4 affect the treatment and care they received during hospitalization, and thus they might  
5 be unwilling to provide negative feedback. To encourage the participants to respond  
6 frankly, the survey was taken on the patients' discharge day, and the nursing staff did  
7 not administer the survey.  
8  
9  
10

## 11 **2.6 Data analysis**

12  
13 Statistical analyses were conducted using IBM-SPSS software version 22 (IBM Corp.,  
14 Armonk, NY, USA), Empower (R) (www.empowerstats.com, X&Y solutions, Inc.,  
15 Boston, MA), and R statistical software. Descriptive analysis was performed for  
16 participants' characteristics and their responses to items about satisfaction and  
17 experience. Values were expressed as the mean and standard deviation for continuous  
18 variables or percentages for categorical variables. Multiple regression models were  
19 used to analyze the effects of patient experience with nursing care and other variables  
20 on the overall patient satisfaction. Independent variables were selected based on  
21 evidence in previous studies showing a significant relation to overall patient  
22 satisfaction and we also included other variables based on our clinical experience.  
23 Model 1 was adjusted for age, sex, residence, literacy level, household monthly  
24 income per capita, type of medical assurance; model 2 was adjusted for age, sex,  
25 residence, literacy level, household monthly income per capita, type of medical  
26 assurance, diagnosis, number of admissions within one year, length of hospital stay.  
27 Non-ordinal categorical variables and ordinal categorical variables with  
28 non-equidistant data were transformed into dummy variables. The probability was  
29 considered significant when  $p < .05$ . No missing data imputation methods were used.  
30  
31  
32  
33  
34  
35  
36  
37  
38  
39  
40  
41  
42  
43  
44  
45

## 46 **2.7 Patient and Public Involvement statement**

47  
48 It was not appropriate or possible to involve patients or the public in the design, or  
49 conduct, or reporting, or dissemination plans of our research.  
50  
51

## 52 **3 Result**

### 53 **Sociodemographic and clinical characteristics of the study participants**

54  
55 Overall, 756 patient surveys distributed among 36 wards were analyzed. The  
56 demographic and clinical characteristics of the participants are shown in Table 1.  
57  
58  
59

### 60 **Patient experience with nursing care**

1  
2  
3  
4 The total patient experience score was 4.54 (0.37). The scores of each item are  
5 presented in Table 2. The lowest scores were related to ‘information and  
6 communication’ (4.34±0.52), ‘coordination of care’ (4.42±0.53) and ‘emotional  
7 support’ (4.56±0.45). Patients had better experiences with ‘patient safety and privacy  
8 protection’ (4.65±0.39), ‘technical competencies’ (4.64±0.38) and ‘responding  
9 requests’ (4.63±0.41).  
10  
11  
12  
13  
14

### 15 **Patient satisfaction with hospital services**

16  
17 The overall patient satisfaction item was skewed toward a positive assessment: 9.2 on  
18 a scale of 1-10, where 10 represents the best score. Of those who responded, 52.0%  
19 were satisfied with the hospital services to a very large extent. Only 1.9% reported  
20 being satisfied to only a small extent, and 0.3% were not at all satisfied with the  
21 hospital services.  
22  
23  
24  
25  
26

### 27 **Relationships between patient experience with nursing care and overall patient 28 satisfaction**

29  
30 A linear relationship between the patient experience of nursing care and overall  
31 patient satisfaction was observed after adjusting for age, sex, household monthly  
32 income per capita, literacy level, residence, medical insurance, length of hospital stay,  
33 number of admissions within one year, and primary diagnosis (Fig. 1). Table 3  
34 presents the results of multivariate regression for the effects of patient experience with  
35 nursing care on the patients’ overall satisfaction with hospital services. The patient  
36 experience with nursing care was significantly associated with overall satisfaction in  
37 the crude model and in the adjusted models. Even after adjusting for 6  
38 sociodemographic and 3 disease-related factors in model 2, the patient experience  
39 with nursing care was still significantly associated with overall patient satisfaction  
40 ( $\beta=1.257$ , adjusted  $R^2= 34.9\%$ ,  $p<0.001$ ).  
41  
42  
43  
44  
45  
46  
47  
48  
49  
50  
51

### 52 **Subgroup analysis of the relationship between patient experience with nursing 53 care and overall patient satisfaction**

54  
55 The subgroup analysis is presented in Figure 2. No significant heterogeneity was  
56 found among analysed subgroups stratified according to age, sex, residence, literacy  
57 level, household monthly income per capita, type of medical assurance, primary  
58  
59  
60

1  
2  
3  
4 diagnosis, number of admissions within one year, and length of hospital stay.

#### 5 6 **4 Discussion**

7  
8 The aim of our study was to analyze the effects of patient experience with nursing  
9 care on overall patient satisfaction. The results showed a linear relationship between  
10 patient experience with nursing care and overall patient satisfaction after the  
11 adjustment for age, sex, family monthly income, educational level, residence, medical  
12 insurance, length of hospital stay, number of admissions, primary diagnosis (Fig. 1).  
13 The patient experience with nursing care explained 34.9% of the variance in overall  
14 patient satisfaction. This finding was consistent with previous studies [17, 22, 25],  
15 which showed that the most important predictor of patient satisfaction with hospitals  
16 was patient experiences with nursing care.  
17  
18  
19  
20  
21  
22  
23  
24

25 The existing studies are commonly characterized by several limitations, particularly  
26 the methods used for the measurement of patient experience with nursing care.  
27 Alongside clinical effectiveness and safety, patient experience is increasingly  
28 recognized as one of the three pillars of healthcare quality [26]. A patient experience  
29 survey is a valid approach to provide feedback about the delivery of health care  
30 services, which asks patients to report their experiences in detail by asking them  
31 specific questions about to what extent certain processes and events occurred during  
32 the course of care. This type of survey can provide results that can be easily  
33 interpreted and acted upon. However, existing studies exploring the relationship of  
34 patient experience with nursing care and overall patient satisfaction did not offer  
35 enough feedback about nursing services. The primary barrier is the low representation  
36 of nursing practice in the existing patient experience surveys. Most patient experience  
37 scales include a limited number of items relating to nursing and fail to provide  
38 thorough and detailed insight into nursing practice from the patients' perspectives. For  
39 instance, the study of Bjertnaes [17] included only 4 items related to nursing care. Our  
40 study developed and used a questionnaire of patient experience with nursing care  
41 through patient interviews, literature analysis, and expert consultation. It consisted of  
42 33 items assessing 8 dimensions of the patients' perception of nursing care and it had  
43 good validity and reliability. Therefore, the survey tool used in our study had a high  
44  
45  
46  
47  
48  
49  
50  
51  
52  
53  
54  
55  
56  
57  
58  
59  
60

1  
2  
3  
4 representation of nursing practice.

5 To our knowledge, this is the first study in China to survey patient experience with  
6 nursing care and to analyze its impact on overall patient satisfaction. Recently, there  
7 has been a growing interest in using patient experience to assess and improve the  
8 performance of the healthcare system in China [17]. However, nursing seems to be  
9 overlooked in this growing trend [27]. Our study showed that patients had worse  
10 experience with ‘information and communication’, ‘coordination of care’ and  
11 ‘emotional support’, which was consistent with study of Senarat[28].  
12  
13  
14  
15  
16  
17  
18

19 As patients’ healthcare demands increase, they are no longer satisfied with passively  
20 receiving care; instead, they are eager to become fully involved in the treatment and  
21 recovery process[29]. Additionally, nurses spend the most time with them among all  
22 medical professionals. In addition to direct care providers, nurses are also expected to  
23 act as navigators coordinating all aspects of care and promoting patient-centered care.  
24 Therefore, coordination of care is a fundamental and core value of nursing practice, a  
25 predictor of quality and a known predictor of satisfaction with medical care [30].  
26 Humanistic care is an indispensable characteristic of nursing services. Numerous  
27 studies have demonstrated that patients’ health outcomes can be improved much more  
28 significantly when caring behaviors are performed with empathy and compassion [31].  
29 Christopher et al. also noted that tactics alone, such as bedside shift reports, health  
30 education, and follow-up phone calls after discharge, were insufficient, while  
31 meaningful strategies to create a positive organizational culture were vital drivers to  
32 promote a successful patient experience [32]. However, most healthcare institutions in  
33 China are task-oriented, and the delivery of nursing care is streamlined with  
34 standardized processes, protocols, and paths. These practices result in the fragmented  
35 nursing care, and patients receive less psychological care and more technical care  
36 from nurses, which negatively influences patient experience.  
37  
38  
39  
40  
41  
42  
43  
44  
45  
46  
47  
48  
49  
50  
51  
52  
53

54 Compared to the other determinants that influence overall patient satisfaction with  
55 hospital services, such as the reputation and the image of hospitals, education and  
56 socioeconomic status of the patients, and length of stay [6], patient experience with  
57 nursing care is amendable. For instance, organizing an afternoon ward round by  
58  
59  
60

nurses to address the communication needs of patients and hanging a poster to share patient feedback with the medical team have been proven to be efficient ways to facilitate good experiences with communication [33]. Understanding the importance of patients' perception of nursing service delivery would enable nursing managers and nursing practitioners to have a better understanding of current problems with healthcare delivery, push for continuous improvement, redesign the delivery of services and help professionals reflect on their practice.

### **Limitations**

This was a single-center study and our findings therefore may not be generalized. However, our hospital is a national large general hospital and the nursing services model has a leading role around the country, therefore, for the Chinese region, our results can be regarded as representative to a considerable extent.

### **Conclusion**

This study provides the first evidence of the importance of nursing care in improving overall patient satisfaction, and demonstrates that when the roles of nurses are expended and the potential of nurses is released, high-quality patient outcomes can be achieved. Understanding the importance of patients' perception of nursing services delivery would enable nursing managers and nursing practitioners to have better understanding of current problems with healthcare delivery, push for continuous improvement, redesign the delivery of services and help professionals reflect on practice modern.

### **Contributorship statement**

Xiao CHEN and Yuxia ZHANG contributed to the study conception and design. Material preparation, data collection and analysis were performed by Xiao CHEN, Yuxia ZHANG, Wei QIN, Zhenghong YU, Jingxian YU, Ying LIN, Xiaorong LI, Zheng ZHENG, and Ying WANG. The first draft of the manuscript was written by Xiao CHEN and Yuxia ZHANG, Wei QIN, Zhenghong YU, Jingxian YU, Ying LIN, Xiaorong LI, Zheng ZHENG, and Ying WANG commented on and revised previous versions of the manuscript. All authors read and approved the final manuscript, and agreed to be accountable for all aspects of the work in ensuring that questions related

1  
2  
3  
4 to the accuracy or integrity of any part of the work were appropriately investigated  
5 and resolved.  
6

### 7 **Competing interest**

- 9 ● We had no associations with commercial entities that provided support for the  
10 work reported in the submitted manuscript.
- 11 ● We had no associations with commercial entities that could be viewed as having  
12 an interest in the general area of the submitted manuscript.
- 13 ● We had no similar financial associations involving their spouse or their children  
14 under 18 years of age.
- 15 ● We had no Non-financial associations that may be relevant to the submitted  
16 manuscript  
17  
18  
19  
20  
21  
22  
23  
24

### 25 **Funding**

26  
27 This work was supported by the Zhongshan hospital of Fudan University under  
28 Award Number 20208ZSFZ02, and the funder had no role in the design of the study,  
29 the collection or analysis of data, or the decision to publish.  
30  
31

### 32 **Ethical statement**

33  
34 The study was approved by the Ethics Committee of Zhongshan hospital of Fudan  
35 university (Approval number B2020-074) and was performed in accordance with the  
36 ethical standards of the 1964 Declaration of Helsinki and its later amendments. Prior  
37 to data collection, all participants were informed of the purpose of this study and  
38 signed written consent forms were obtained to inform them of the rights, risks, and  
39 advantages of participation.  
40  
41  
42  
43  
44  
45

### 46 **Data sharing**

47  
48 Data are available upon reasonable request.  
49  
50  
51  
52  
53  
54  
55  
56  
57  
58  
59  
60



## References

- [1] Donabedian A. The quality of care: How can it be assessed?. *JAMA*, 1988,260(12):1743-1748.
- [2] Zamora D. Using Patient Satisfaction as a Basis for Reimbursement: Political, Financial, and Philosophical Implications. *Creat nurs*, 2012,18(3):118-123.
- [3] Hospital value-based purchasing. Centers for Medicare & Medicaid Services.2015.[https://www.cms.gov/Outreach-and-Education/Medicare-Learning-Network-MLN/MLNProducts/Downloads/Hospital\\_VBPurchasing\\_Fact\\_Sheet\\_ICN907664.pdf](https://www.cms.gov/Outreach-and-Education/Medicare-Learning-Network-MLN/MLNProducts/Downloads/Hospital_VBPurchasing_Fact_Sheet_ICN907664.pdf). Accessed 22 Dec 2020.
- [4] Schneider J, Kaplan SH, Greenfield S, et al. Better physician-patient relationships are associated with higher reported adherence to antiretroviral therapy in patients with HIV infection. *J Gen Intern Med*, 2004,19(11):1096-1103.
- [5] Hill MH, Doddato T. Relationships among patient satisfaction, intent to return, and intent to recommend services provided by an academic nursing center. *J cult divers*, 2002,9(4):108.
- [6] Batbaatar E, Dorjdagva J, Luvsannyam A, et al. Determinants of patient satisfaction: a systematic review. *Perspect Public Health*, 2017,137(2):89-101.
- [7] Chang E, Hancock K, Chenoweth L, et al. The influence of demographic variables and ward type on elderly patients' perceptions of needs and satisfaction during acute hospitalization. *Int J Nurs Pract*, 2003,9(3):191-201.
- [8] Mangelsdorff AD, Finstuen K. Patient satisfaction in military medicine: status and an empirical test of a model. *Mil med*, 2003,168(9):744-749.
- [9] Zhu J, Weingart SN, Ritter GA, et al. Racial/Ethnic Disparities in Patient Experience with Communication in Hospitals: Real Differences or Measurement Errors? *Med Care*, 2015,53(5): 446-454.
- [10] Min R, Li L, Zi C, et al. Evaluation of patient experience in county-level public hospitals in China: a multicentred, cross-sectional study. *BMJ Open*, 2019,9(11):e34225.
- [11] Xie J, Hu Y, Lu C, et al. What Are the Risk Factors of Negative Patient Experience? A Cross-Sectional Study in Chinese Public Hospitals. *Inquiry (Chicago)*,

1  
2  
3  
4 2019,56:1402730258.

5 [12] Greenslade JH, Jimmieson NL. Organizational factors impacting on patient  
6 satisfaction: a cross sectional examination of service climate and linkages to nurses'  
7 effort and performance. *Int J Nurs Stud*, 2011,48(10):1188-1198.

8  
9  
10  
11 [13] Ahmed F, Burt J, Roland M. Measuring patient experience: concepts and  
12 methods. *Patient*, 2014,7(3):235-241.

13  
14  
15 [14] Larson E, Sharma J, Bohren MA, et al. When the patient is the expert: measuring  
16 patient experience and satisfaction with care. *Bull World Health Organ*,  
17 2019,97(8):563-569.

18  
19  
20  
21 [15] Bleich S. How does satisfaction with the health-care system relate to patient  
22 experience? *Bull World Health Organ*, 2009,87(4):271-278.

23  
24  
25 [16] Park C, Zakare-Fagbamila RT, Dickson W, et al. The limited influence of  
26 neurosurgeons' behavior on inpatient satisfaction: a retrospective multihospital  
27 analysis. *J Neurosurg*, 2020,31:1-7.

28  
29  
30  
31 [17] Bjertnaes OA, Sjetne IS, Iversen HH. Overall patient satisfaction with hospitals:  
32 effects of patient-reported experiences and fulfilment of expectations. *BMJ Qual Saf*,  
33 2011,21(1):39-46.

34  
35  
36 [18] The Lancet. 2020: unleashing the full potential of nursing. *The Lancet*,  
37 2019,394(10212):1879.

38  
39  
40  
41 [19] Nursing and midwifery. World Health Organization. 2020. <https://www.who.int/news-room/fact-sheets/detail/nursing-and-midwifery>. Accessed 22 Dec 2020.

42  
43  
44 [20] Kutney-Lee A, McHugh MD, Sloane DM, et al. Nursing: A Key To Patient  
45 Satisfaction. *Health Aff*, 2009,28(Supplement 3):w669-w677.

46  
47  
48 [21] Desborough J, Phillips C, Mills J, et al. Developing a positive patient experience  
49 with nurses in general practice: An integrated model of patient satisfaction and  
50 enablement. *J Adv Nurs*, 2018,74(3): 564-578.

51  
52  
53 [22] Schmidt LA. Patients' perceptions of nurse staffing, nursing care, adverse events,  
54 and overall satisfaction with the hospital experience. *Nurs Econ*, 2004,22(6):295-306,  
55 291.

56  
57  
58 [23] von Elm E, Altman DG, Egger M, et al. The Strengthening the Reporting of  
59  
60

1  
2  
3  
4  
5  
6  
7  
8  
9  
10  
11  
12  
13  
14  
15  
16  
17  
18  
19  
20  
21  
22  
23  
24  
25  
26  
27  
28  
29  
30  
31  
32  
33  
34  
35  
36  
37  
38  
39  
40  
41  
42  
43  
44  
45  
46  
47  
48  
49  
50  
51  
52  
53  
54  
55  
56  
57  
58  
59  
60

Observational Studies in Epidemiology (STROBE) Statement: Guidelines for reporting observational studies. *Int J Surg*, 2014,12(12):1495-1499.

[24] NHS patient experience framework. Department of Health. 2011. [https://assets.publishing.service.gov.uk/government/uploads/system/uploads/attachment\\_data/file/215159/dh\\_132788.pdf](https://assets.publishing.service.gov.uk/government/uploads/system/uploads/attachment_data/file/215159/dh_132788.pdf). Accessed 20 Dec 2020.

[25] Desborough J, Bagheri N, Banfield M, et al. The impact of general practice nursing care on patient satisfaction and enablement in Australia: A mixed methods study. *Int J Nurs Stud*, 2016,64:108-119.

[26] Institute of Medicine. Crossing the quality chasm: a new health system for the 21st century. Washington, DC: National Academy Press, 2001.

[27] Zhang Y, Li Q, Liu H. From patient satisfaction to patient experience: A call to action for nursing in China. *J Nurs Manag*, 2020,28(2):450-456.

[28] Senarat U, Gunawardena NS. Development of an Instrument to Measure Patient Perception of the Quality of Nursing Care and Related Hospital Services at the National Hospital of Sri Lanka. *Asian Nurs Res*, 2011,5(2):71-80.

[29] Cheraghi MA, Esmaeili M, Salsali M. Seeking Humanizing Care in Patient-Centered Care Process: A Grounded Theory Study. *Holist nurs pract*, 2017,31(6):359-368.

[30] Davey A, Carter M, Campbell JL. Priorities for young adults when accessing UK primary care: literature review. *Prim Health Care Res Dev*, 2013,14(4):341-349.

[31] Del Canale S, Louis DZ, Maio V, et al. The relationship between physician empathy and disease complications: an empirical study of primary care physicians and their diabetic patients in Parma, Italy. *Academic medicine : journal of the Association of American Medical Colleges*, 2012,87(9):1243-1249.

[32] Karam C. The Evolution of Patient Satisfaction to Patient Experience. *Front Health Serv Manage*, 2017,33(3):30-34.

[33] Sheard L, Marsh C, Mills T, et al. Using patient experience data to develop a patient experience toolkit to improve hospital care: a mixed-methods study. Southampton (UK): NIHR Journals Library, 2019.

**Table 1 Socio-demographic and clinical characteristics of study participants**

| Characteristics                                          | Value      |
|----------------------------------------------------------|------------|
| <b>Sex, n(%)</b>                                         |            |
| Male                                                     | 465, 61.5% |
| Female                                                   | 291, 38.5% |
| <b>Age, mean±SD</b>                                      | 57.7±14.5  |
| <b>Marital status, n(%)</b>                              |            |
| Single                                                   | 41, 5.4%   |
| Ever married                                             | 715, 94.6% |
| <b>Literacy level, n(%)</b>                              |            |
| Primary education or below                               | 109, 14.4% |
| Secondary education                                      | 454, 60.1% |
| College education or above                               | 193, 25.5% |
| <b>Household monthly income per capita, n(%)</b>         |            |
| <5000 RMB                                                | 288, 38.1% |
| 5000-9999 RMB                                            | 293, 38.8% |
| >10000 RMB                                               | 175, 23.1% |
| <b>Main source of medical expense, n(%)</b>              |            |
| Urban medical insurance                                  | 505, 66.8% |
| Rural medical insurance                                  | 163, 21.6% |
| Commercial medical insurance                             | 8, 1.0%    |
| Personal funds                                           | 80, 10.6%  |
| <b>Residence, n(%)</b>                                   |            |
| Rural areas                                              | 204, 27%   |
| Urban areas                                              | 416, 55%   |
| Rural-urban fringe areas                                 | 136, 18%   |
| <b>Patient admitting ward, n(%)</b>                      |            |
| Medical ward                                             | 360, 47.6% |
| Surgical ward                                            | 396, 52.4% |
| <b>Diagnosed with cancer, n(%)</b>                       |            |
| Yes                                                      | 302, 39.9% |
| No                                                       | 454, 60.1% |
| <b>Number of hospital admissions within 1 year, n(%)</b> |            |
| 1                                                        | 457, 60.4% |
| 2                                                        | 121, 16.0% |
| 3                                                        | 58, 7.7%   |
| >3                                                       | 120, 15.9% |

Table 2 Percentage distribution of items for experience with nursing care in participants (n, %)

| Domain                               | Items                                                                        | Never/Strongly disagree | Occasionally/ Disagree | Sometimes/ Neutral | Often/ Agree | Always/Strongly Agree |
|--------------------------------------|------------------------------------------------------------------------------|-------------------------|------------------------|--------------------|--------------|-----------------------|
| <b>Coordination of care</b>          | Nurses provided well-organized admission process                             | 0(0.0%)                 | 5(0.7%)                | 31(4.1%)           | 317(41.9%)   | 403(53.3%)            |
|                                      | Nurses informed me about who are responsible for my treatment and care       | 0(0.0%)                 | 2(0.3%)                | 37(4.9%)           | 299(39.6%)   | 418(55.2%)            |
|                                      | Nurses provided well-organized discharge plan                                | 3(0.4%)                 | 7(0.9%)                | 89(11.8%)          | 336(44.4%)   | 321(42.5%)            |
| <b>Physical environment</b>          | Nurses provided a clean ward environment                                     | 4(0.5%)                 | 2(0.3%)                | 15(2.0%)           | 281(37.2%)   | 454(60.1%)            |
|                                      | Nurses provided a quiet ward environment                                     | 4(0.5%)                 | 7(0.9%)                | 24(3.2%)           | 251(33.2%)   | 470(62.2%)            |
|                                      | Nurses provided an ordered ward environment                                  | 2(0.3%)                 | 6(0.8%)                | 26(3.4%)           | 246(32.5%)   | 476(63.0%)            |
| <b>Information and communication</b> | Nurses informed me about usage, dosage and side effects of medicines         | 0(0.0%)                 | 0(0.0%)                | 14(1.9%)           | 347(45.9%)   | 395(52.2%)            |
|                                      | Nurses helped me better know the disease                                     | 0(0.0%)                 | 1(0.1%)                | 70(9.3%)           | 393(52.0%)   | 292(38.6%)            |
|                                      | Nurses informed me about results of tests                                    | 14(1.9%)                | 110(14.5%)             | 145(19.2%)         | 382(50.5%)   | 105(13.9%)            |
|                                      | Nurses provided information about the appropriate dietary                    | 0(0.0%)                 | 2(0.3%)                | 64(8.5%)           | 314(41.5%)   | 376(49.7%)            |
|                                      | Nurses provided information about disease recovery                           | 0(0.0%)                 | 1(0.1%)                | 28(3.7%)           | 276(36.5%)   | 451(59.7%)            |
|                                      | Nurses provided health information through multiple routes                   | 0(0.0%)                 | 0(0.0%)                | 30(4.0%)           | 272(35.9%)   | 454(60.1%)            |
|                                      | Nurses provided relevant instructions before implementing medical procedures | 0(0.0%)                 | 16(2.1%)               | 27(3.6%)           | 331(43.8%)   | 382(50.5%)            |

Table 2 Percentage distribution of items for experience with nursing care in participants (continued)

| Domain                                     | Items                                                                                                                               | Never/Strongly disagree | Occasionally/ Disagree | Sometimes/ Neutral | Often/ Agree | Always/Strongly Agree |
|--------------------------------------------|-------------------------------------------------------------------------------------------------------------------------------------|-------------------------|------------------------|--------------------|--------------|-----------------------|
| <b>Emotional support</b>                   | Nurses treated me patiently                                                                                                         | 0(0.0%)                 | 1(0.1%)                | 14(1.9%)           | 288(38.1%)   | 453 (59.9%)           |
|                                            | Nurses treated me with respect                                                                                                      | 0(0.0%)                 | 2(0.3%)                | 4(0.5%)            | 239(31.6%)   | 511 (67.6%)           |
|                                            | Nurses' behaviors made me feel cared for                                                                                            | 0(0.0%)                 | 0(0.0%)                | 38(5.0%)           | 298(39.4%)   | 420(55.6%)            |
|                                            | Nurses helped me manage the anxiety, stress, fears I had about my illness                                                           | 1(0.1%)                 | 4(0.5%)                | 23(3.0%)           | 307(40.6%)   | 421(55.8%)            |
| <b>Technical competencies</b>              | Nurses were proficient in venipuncture procedures                                                                                   | 0(0.0%)                 | 1(0.1%)                | 5(0.7%)            | 261(35.8%)   | 463(63.4%)            |
|                                            | Nurses were proficient in other nursing procedures, such as intramuscular injection, hypodermic injection, change of dressing, etc. | 0(0.0%)                 | 0(0.0%)                | 3(0.4%)            | 257(34.0%)   | 496(65.6%)            |
| <b>Monitoring the progress of diseases</b> | Nurses made an inspection tour of the ward                                                                                          | 0(0.0%)                 | 2(0.3%)                | 21(2.8%)           | 191(25.3%)   | 542(71.7%)            |
|                                            | Nurses monitored my vital signs timely                                                                                              | 1(0.1%)                 | 3(0.4%)                | 6(0.8%)            | 264(34.9%)   | 482(63.4%)            |
|                                            | Nurses monitored the process of drug treatment                                                                                      | 0(0.0%)                 | 0(0.0%)                | 8(1.1%)            | 243(32.1%)   | 505(66.8%)            |
|                                            | Nurses could recognize my health issues on time                                                                                     | 2(0.2%)                 | 1(0.1%)                | 43(5.7%)           | 300 (39.7%)  | 410(54.2%)            |

Table 2 Percentage distribution of items for experience with nursing care in participants (continued)

| Domain                                        | Items                                                                                                             | Never/Strongly disagree | Occasionally/ Disagree | Sometimes/ Neutral | Often/ Agree | Always/Strongly Agree |
|-----------------------------------------------|-------------------------------------------------------------------------------------------------------------------|-------------------------|------------------------|--------------------|--------------|-----------------------|
| <b>Responding requests</b>                    | Nurses could come and see me in time after pressing the call button                                               | 4(0.5%)                 | 2(0.3%)                | 20(2.6%)           | 88(11.6%)    | 642 (84.9%)           |
|                                               | Nurses dealt with my requests promptly                                                                            | 0(0.0%)                 | 0(0.0%)                | 29(3.8%)           | 304(40.2%)   | 423(56.0%)            |
|                                               | Nurses responded to my suggestions or complaints seriously                                                        | 1(0.1%)                 | 1(0.1%)                | 13(1.7%)           | 280(37.0%)   | 461(61.0%)            |
| <b>Patients safety and privacy protection</b> | Nurses could handle in time when my condition experienced changes                                                 | 0(0.0%)                 | 1(0.1%)                | 13(1.7%)           | 282(37.3%)   | 460(60.8%)            |
|                                               | Nurses informed me about how to prevent the risk events, such as falling and dropping from the bed                | 3(0.4%)                 | 4(0.5%)                | 21(2.8%)           | 251(33.2%)   | 477(63.1%)            |
|                                               | Nurses clearly introduced the use of safety protection equipment, such as the emergency call button in the toilet | 5(0.7%)                 | 2(0.3%)                | 26(3.4%)           | 249(32.9%)   | 474(62.7%)            |
|                                               | Nurses verified my identify when performing nursing procedures                                                    | 1(0.1%)                 | 0(0.0%)                | 1(0.1%)            | 231(30.6%)   | 523(69.2%)            |
|                                               | Nurses applied hand disinfection before performing nursing procedures                                             | 0(0.0%)                 | 1(0.1%)                | 55(7.3%)           | 186(24.6%)   | 514(68.0%)            |
|                                               | Nurses provided protective measures when performing nursing procedures in private body parts                      | 2(0.3%)                 | 0(0.0%)                | 1(0.1%)            | 99(13.1%)    | 654(86.5%)            |
|                                               | Nurses treated my information confidentially                                                                      | 1(0.1%)                 | 4(0.5%)                | 6(0.8%)            | 248(32.8%)   | 497(65.7%)            |

**Table 3 Multivariate regression for effect of patient experience with nursing care on overall patient satisfaction**

| Variable                                          | Crude model            |         |             | Multivariate-adjusted model 1 |         |             | Multivariate-adjusted model 2 |         |             |
|---------------------------------------------------|------------------------|---------|-------------|-------------------------------|---------|-------------|-------------------------------|---------|-------------|
|                                                   | $\beta$ (95% CI)       | P value | P for trend | $\beta$ (95% CI)              | P value | P for trend | $\beta$ (95% CI)              | P value | P for trend |
| Patient experience with nursing care (Continuous) | 1.269<br>(1.150,1.389) | <0.001  |             | 1.273<br>(1.153-1.393)        | <0.001  |             | 1.257<br>(1.138-1.377)        | <0.001  |             |
| Patient experience with nursing care (Tertiles)   |                        |         |             |                               |         |             |                               |         |             |
| T1<br>(3.23-4.45)                                 | 0                      |         | <0.001      | 0                             |         | <0.001      | 0                             |         | <0.001      |
| T2<br>(4.46-4.84)                                 | 0.726<br>(0.609,0.843) | <0.001  |             | 0.778<br>(0.669-0.887)        | <0.001  |             | 0.774<br>(0.665-0.882)        | <0.001  |             |
| T3<br>(4.85-5.00)                                 | 0.964<br>(0.846,1.083) | <0.001  |             | 1.011<br>(0.901-1.121)        | <0.001  |             | 0.995<br>(0.885-1.105)        | <0.001  |             |

Model 1 adjusted for age, sex, residence, literacy level, household monthly income per capita, type of medical assurance; model 2 adjusted for age, sex, residence, literacy level, household monthly income per capita, type of medical assurance, diagnosis, number of admissions, length of hospital stay.



1  
2  
3  
4  
5  
6  
7  
8  
9  
10  
11  
12  
13  
14  
15  
16  
17  
18  
19  
20  
21  
22  
23  
24  
25  
26  
27  
28  
29  
30  
31  
32  
33  
34  
35  
36  
37  
38  
39  
40  
41  
42  
43  
44  
45  
46

**Figure 1 The relationship between patient experience with nursing care and overall patient satisfaction**

**Figure 2 Subgroup analysis for effect of patient experience with nursing care on overall satisfaction with hospital services**

For peer review only

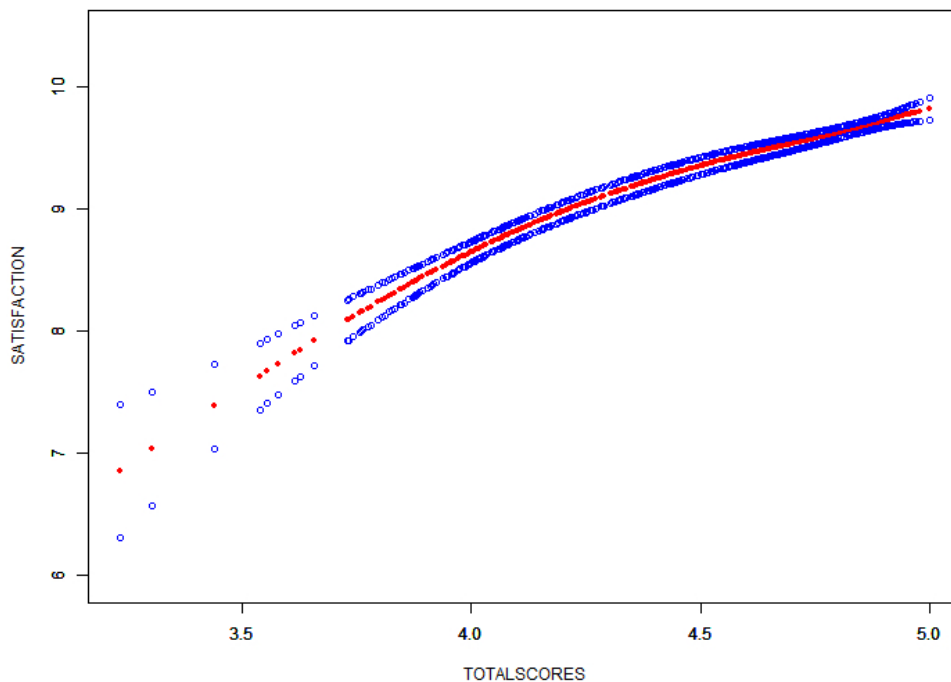

Figure 1 The relationship between patient experience with nursing care and overall patient satisfaction

254x197mm (72 x 72 DPI)

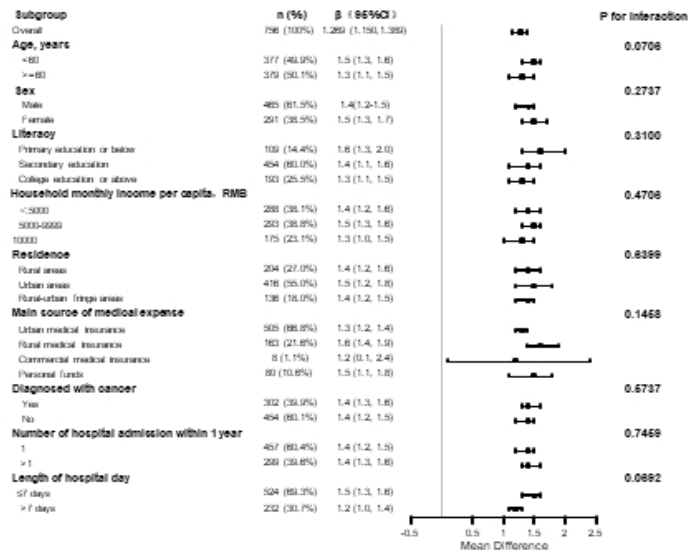

Figure 2 Subgroup analysis for effect of patient experience with nursing care on overall satisfaction with hospital services

403x353mm (38 x 38 DPI)

## How does overall hospital satisfaction relate to patient experience with nursing care? a cross-sectional study

**Xiao CHEN, Yuxia ZHANG, Wei QIN, Jingxian Yu, Zhenghong YU, Zheng ZHEN**

**Corresponding Author:** Yuxia Zhang, RN, PhD, FAAN, Nursing Department, Zhongshan Hospital of Fudan University. Address: No.180, Fenglin road, Shanghai, People's Republic of China. Telephone: +86 13816881925. Fax number: 64041990. Email: [zhang.yx@aliyun.com](mailto:zhang.yx@aliyun.com)

This study is a cross-sectional survey and is reported according to the 'The Strengthening the Reporting of Observational Studies in Epidemiology (STROBE) Statement for reporting observational studies' obtained from the EQUATOR Network website.

| Item                  | STROBE description                                                                                                              | Reported on pages |
|-----------------------|---------------------------------------------------------------------------------------------------------------------------------|-------------------|
| 1. Title and abstract | (a) Indicate the study's design with a commonly used term in the title or the abstract                                          | 1                 |
|                       | (b) Provide in the abstract an informative and balanced summary of what was done and what was found                             | 1                 |
| 2. Background         | Explain the scientific background and rationale for the investigation being reported                                            | 2-3               |
| 3. Objectives         | State specific objectives, including any prespecified hypotheses                                                                | 3                 |
| 4. Study design       | Present key elements of study design early in the paper                                                                         | 4                 |
| 5. Setting            | Describe the setting, locations, and relevant dates, including periods of recruitment, exposure, follow-up, and data collection | 4                 |
| 6. Participants       | Give the eligibility criteria, and the sources and methods of selection of participants                                         | 4                 |
| 7. Variables          | Clearly define all outcomes, exposures, potential confounders, and effect modifiers. Give diagnostic criteria, if applicable    | 5                 |

| Item                       | STROBE description                                                                                                                                                                                                                                                                                                                                                | Reported on pages |
|----------------------------|-------------------------------------------------------------------------------------------------------------------------------------------------------------------------------------------------------------------------------------------------------------------------------------------------------------------------------------------------------------------|-------------------|
| 8. Data sources            | For each variable of interest, give sources of data and details of methods of assessment. Describe comparability of assessment methods if there is more than one group                                                                                                                                                                                            | 5                 |
| 9. Bias                    | Describe any efforts to address potential sources of bias                                                                                                                                                                                                                                                                                                         | 4,7               |
| 10. Study size             | Explain how the study size was arrived at                                                                                                                                                                                                                                                                                                                         | 4                 |
| 11. Quantitative variables | Explain how quantitative variables were handled in the analyses. If applicable, describe which groupings were chosen and why                                                                                                                                                                                                                                      | 7                 |
| 12. Statistical methods    | <p>(a) Describe all statistical methods, including those used to control for confounding</p> <p>(b) Describe any methods used to examine subgroups and interactions</p> <p>(c) Explain how missing data were addressed</p> <p>(d) If applicable, describe analytical methods taking account of sampling strategy</p> <p>(e) Describe any sensitivity analyses</p> | 7                 |
| 13. Participants           | <p>(a) Report numbers of individuals at each stage of study—eg numbers potentially eligible, examined for eligibility, confirmed eligible</p> <p>(b) Give reasons for non-participation at each stage</p> <p>(c) Consider use of a flow diagram</p>                                                                                                               | 4                 |
| 14. Descriptive data       | <p>(a) Give characteristics of study participants (eg demographic, clinical, social) and information on exposures and potential confounders</p> <p>(b) Indicate number of participants with missing data for each variable of interest</p>                                                                                                                        | Table 1           |

| Item                 | STROBE description                                                                                                                                                                                                                                                                                                                                                                                            | Reported on pages |
|----------------------|---------------------------------------------------------------------------------------------------------------------------------------------------------------------------------------------------------------------------------------------------------------------------------------------------------------------------------------------------------------------------------------------------------------|-------------------|
| 15. Outcome data     | Report numbers of outcome events or summary measures                                                                                                                                                                                                                                                                                                                                                          | Table 2           |
| 16. Main results     | (a) Give unadjusted estimates and, if applicable, confounder-adjusted estimates and their precision (eg, 95% confidence interval). Make clear which confounders were adjusted for and why they were included<br>(b) Report category boundaries when continuous variables were categorized<br>(c) If relevant, consider translating estimates of relative risk into absolute risk for a meaningful time period | 8                 |
| 17. Other analyses   | Report other analyses done-eg analyses of subgroups and interactions, and sensitivity analyses                                                                                                                                                                                                                                                                                                                | Figure 2; 9       |
| 18. Key results      | Summarise key results with reference to study objectives                                                                                                                                                                                                                                                                                                                                                      | 9-11              |
| 19. Limitations      | Discuss limitations of the study, taking into account sources of potential bias or imprecision. Discuss both direction and magnitude of any potential bias                                                                                                                                                                                                                                                    | 11                |
| 20. Interpretation   | Give a cautious overall interpretation of results considering objectives, limitations, multiplicity of analyses, results from similar studies, and other relevant evidence                                                                                                                                                                                                                                    | 9-11              |
| 21. Generalisability | Discuss the generalisability (external validity) of the study results                                                                                                                                                                                                                                                                                                                                         | 11                |
| 22. Funding          | Give the source of funding and the role of the funders for the present study and, if applicable, for the original study on which the present article is based                                                                                                                                                                                                                                                 | Title page        |

# BMJ Open

## How does overall hospital satisfaction relate to patient experience with nursing care? a cross-sectional study in China

|                                 |                                                                                                                                                                                                                                                                                                                                                                                                                                                                                                                                                                                                                                                                                                                    |
|---------------------------------|--------------------------------------------------------------------------------------------------------------------------------------------------------------------------------------------------------------------------------------------------------------------------------------------------------------------------------------------------------------------------------------------------------------------------------------------------------------------------------------------------------------------------------------------------------------------------------------------------------------------------------------------------------------------------------------------------------------------|
| Journal:                        | <i>BMJ Open</i>                                                                                                                                                                                                                                                                                                                                                                                                                                                                                                                                                                                                                                                                                                    |
| Manuscript ID                   | bmjopen-2021-053899.R1                                                                                                                                                                                                                                                                                                                                                                                                                                                                                                                                                                                                                                                                                             |
| Article Type:                   | Original research                                                                                                                                                                                                                                                                                                                                                                                                                                                                                                                                                                                                                                                                                                  |
| Date Submitted by the Author:   | 22-Nov-2021                                                                                                                                                                                                                                                                                                                                                                                                                                                                                                                                                                                                                                                                                                        |
| Complete List of Authors:       | Chen, Xiao; Zhongshan Hospital Fudan University, Nursing department<br>Zhang, Yuxia; Zhongshan Hospital Fudan University, Department of Nursing<br>Qin, Wei; Zhongshan Hospital Fudan University, Department of Nursing<br>Yu, Zhenghong; Zhongshan Hospital Fudan University, Department of Surgery<br>Yu, JingXian; Zhongshan Hospital Fudan University, Department of Liver Disease<br>Lin, Ying; Zhongshan Hospital Fudan University, Department of Cardiology<br>Li, XiaoRong; Zhongshan Hospital Fudan University, Department of Internal medicine<br>Zheng, Zheng; Zhongshan Hospital Fudan University, Department of Respiratory<br>Wang, Ying; Zhongshan Hospital Fudan University, Department of Nursing |
| <b>Primary Subject Heading</b>: | Nursing                                                                                                                                                                                                                                                                                                                                                                                                                                                                                                                                                                                                                                                                                                            |
| Secondary Subject Heading:      | Nursing, Health services research                                                                                                                                                                                                                                                                                                                                                                                                                                                                                                                                                                                                                                                                                  |
| Keywords:                       | Quality in health care < HEALTH SERVICES ADMINISTRATION & MANAGEMENT, HEALTH SERVICES ADMINISTRATION & MANAGEMENT, Health & safety < HEALTH SERVICES ADMINISTRATION & MANAGEMENT                                                                                                                                                                                                                                                                                                                                                                                                                                                                                                                                   |
|                                 |                                                                                                                                                                                                                                                                                                                                                                                                                                                                                                                                                                                                                                                                                                                    |

SCHOLARONE™  
Manuscripts



I, the Submitting Author has the right to grant and does grant on behalf of all authors of the Work (as defined in the below author licence), an exclusive licence and/or a non-exclusive licence for contributions from authors who are: i) UK Crown employees; ii) where BMJ has agreed a CC-BY licence shall apply, and/or iii) in accordance with the terms applicable for US Federal Government officers or employees acting as part of their official duties; on a worldwide, perpetual, irrevocable, royalty-free basis to BMJ Publishing Group Ltd ("BMJ") its licensees and where the relevant Journal is co-owned by BMJ to the co-owners of the Journal, to publish the Work in this journal and any other BMJ products and to exploit all rights, as set out in our [licence](#).

The Submitting Author accepts and understands that any supply made under these terms is made by BMJ to the Submitting Author unless you are acting as an employee on behalf of your employer or a postgraduate student of an affiliated institution which is paying any applicable article publishing charge ("APC") for Open Access articles. Where the Submitting Author wishes to make the Work available on an Open Access basis (and intends to pay the relevant APC), the terms of reuse of such Open Access shall be governed by a Creative Commons licence – details of these licences and which [Creative Commons](#) licence will apply to this Work are set out in our licence referred to above.

Other than as permitted in any relevant BMJ Author's Self Archiving Policies, I confirm this Work has not been accepted for publication elsewhere, is not being considered for publication elsewhere and does not duplicate material already published. I confirm all authors consent to publication of this Work and authorise the granting of this licence.



**How does overall hospital satisfaction relate to patient experience with nursing care? a cross-sectional study in China**

**Xiao CHEN, Yuxia ZHANG, Wei QIN, Zhenghong YU, Jingxian YU, Ying LIN, Xiaorong LI, Zheng ZHENG, Ying WANG**

**Xiao CHEN, MD, RN**, Department of Nursing, Zhongshan Hospital of Fudan University, Shanghai, People's Republic of China. Email: [chenxiao1992@aliyun.com](mailto:chenxiao1992@aliyun.com). Postal code: 200032.

**Yuxia ZHANG, PhD, RN, FAAN**, Department of Nursing, Zhongshan Hospital of Fudan University, Shanghai, People's Republic of China. Email: [zhang.yuxia@zs-hospital.sh.cn](mailto:zhang.yuxia@zs-hospital.sh.cn). Postal code: 200032.

**Wei QIN, MD, RN**, Department of Internal Medicine, Zhongshan Hospital of Fudan University, Shanghai, People's Republic of China. Email: [qin.wei@zs-hospital.sh.cn](mailto:qin.wei@zs-hospital.sh.cn). Postal code: 200032

**Zhenghong YU, BSN, RN**, Department of Surgery, Zhongshan Hospital of Fudan University, Shanghai, People's Republic of China. Email: [yu.zhenghong@zs-hospital.sh.cn](mailto:yu.zhenghong@zs-hospital.sh.cn). Postal code: 200032

**Jingxian YU, BSN, RN**, Department of Liver Disease, Zhongshan Hospital of Fudan University, Shanghai, People's Republic of China. Email: [yu.jingxian@zs-hospital.sh.cn](mailto:yu.jingxian@zs-hospital.sh.cn). Postal code: 200032

**Ying LIN, BSN, RN**, Department of Heart Disease, Zhongshan Hospital of Fudan University, Shanghai, People's Republic of China. Email: [lin.ying@zs-hospital.sh.cn](mailto:lin.ying@zs-hospital.sh.cn). Postal code: 200032

**Xiaorong LI, BSN, RN**, Department of Internal Medicine, Zhongshan Hospital of Fudan University, Shanghai, People's Republic of China. Email: [li.xiaorong@zs-hospital.sh.cn](mailto:li.xiaorong@zs-hospital.sh.cn). Postal code: 200032

**Zheng ZHENG, BSN, RN**, Department of Respiratory, Zhongshan Hospital of Fudan University, Shanghai, People's Republic of China. Email: [zheng.zheng@zs-hospital.sh.cn](mailto:zheng.zheng@zs-hospital.sh.cn). Postal code: 200032

**Ying WANG, BSN, RN**, Department of geriatrics, Zhongshan Hospital of Fudan University, Shanghai, People's Republic of China. Email:

wang.ying1@zs-hospital.sh.cn. Postal code: 200032

**Corresponding Author:** Yuxia Zhang, RN, PhD, FAAN, Nursing Department, Zhongshan Hospital of Fudan University. Address: No.180, Fenglin road, Shanghai, People's Republic of China. Telephone: +86 13816881925. Fax number: 64041990. Email: zhang.yuxia@zs-hospital.sh.cn.

## Abstract

**Objective:** To determine how patient experience with nursing care influence patient satisfaction with overall hospital services.

**Design:** This was a cross-sectional study.

**Setting:** Inpatients were consecutively recruited at the national hospital (with 2000 beds) in Shanghai, China.

**Participants:** The inclusion criteria were as follows: (1) hospitalized for 2 days or more; (2) able to read and understand Chinese; and (3) aged 18 years old or above. Patients with mental health problems were excluded. 756 patient surveys distributed among 36 wards were analyzed. The mean age of participants in the study was 57.7 (SD=14.5) and ranged from 18-80 years. Most participants were male (61.5%) and ever married (94.6%).

**Primary and secondary outcome measures:** Patient experience with nursing care, meaning the sum of all interactions between patients and nurses, was measured using the self-designed questionnaire, which was developed by patient interviews, literature analysis and expert consultation. The overall patient satisfaction question was measured with a ten-point response option ranging from 1-10.

**Results:** A linear relationship between the patient experience with nursing care and overall patient satisfaction was observed. The patient experience with nursing care was significantly associated with overall satisfaction in the crude model and in the adjusted models. Even after adjusting for 6 sociodemographic and 3 disease-related factors, the patient experience with nursing care explained 34.9% of the variation in overall patient satisfaction.

**Conclusions:** This study showed that patient experience with nursing care was an

important predictor for overall patient satisfaction.

**Key words:** Patient satisfaction; Patient experience; Nursing care; Health services research

### **Strengths and limitations of this study**

- This study used a valid and specific questionnaire of patient experience with nursing care made by patient interviews, literature analysis, and expert consultation to investigate patient experience with nursing care.
- This study quantitatively analyzed the impact of patient experience with nursing care on overall patient satisfaction.
- This study first surveyed patient experience with nursing care systematically and comprehensively in China.
- This was a single-center study and our findings therefore may not be generalized.
- This study didn't survey hospital-unit-related characteristics, such as the organization's patient-centered culture and nurses' practice environment. These variables were not available in our data sample but might be associated with patient experience with nursing care and also have an effect on overall patient satisfaction.

## **1 Introduction**

In the age of patient-centered care, as value-based care expands, patient satisfaction has become a key indicator in assessing healthcare quality and hospital performance [1] and is being used more frequently to determine hospital performance and hospital reimbursement [2, 3]. Patients who are satisfied with the healthcare system are more willing to comply with medical orders and treatments [4], are more likely to return to the healthcare organization for future care, and are more likely to recommend healthcare services to their family members and friends [5]. As the healthcare quality improvement action plan proliferated internationally, the National Health Commission of the People's Republic of China posted an announcement implementing the National Healthcare Improvement Initiative (NHII) in January 2015, with the overall goal of improving the patient satisfaction on a national level

1  
2  
3  
4 [6].

5 Recognizing factors that influence overall patient satisfaction will help improve  
6 medical care. A large body of research has identified the factors that account for the  
7 variations in patient satisfaction [7]. However, such studies have largely focused on  
8 patient characteristics, such as age [8], gender [9], race/ethnicity [10], financial status  
9 [11], and organizational factors [12, 13]; additionally, these studies have inconsistent  
10 findings and explained only a small fraction of the variance in patient satisfaction.  
11

12  
13 In recent years, patient experience has been increasingly used to evaluate the  
14 quality of healthcare [14]. Patient experience is defined as “the sum of all interactions,  
15 shaped by an organization’s culture, that influence patient perceptions across the  
16 continuum of care” [15]. Patient experience measures the structures and processes of  
17 care, while patient satisfaction survey serves as a patient-reported outcome measure  
18 [15]. The causal link between structure, process and outcome might be expected  
19 theoretically. However, patient satisfaction is subjective and obscure, and dependent  
20 on patients’ expectations, fulfilment of expectations, actual experiences, health  
21 outcome, and other individual factors. Therefore, several studies have explored the  
22 relationship between patient experience and patient satisfaction with the health care  
23 system [16-18], with an attempt to determine to what extent that patient experience  
24 affects patient satisfaction, considered that patient experience can provide tangible  
25 feedbacks to current care delivery and these feedbacks are amendable and actionable  
26 by providers to improve quality of healthcare, whereas other factors such as patients’  
27 expectations and individual characteristics are hard to change.  
28  
29

30  
31 Nurses are a vital and central part of the health care system [19], accounting for  
32 nearly half of the global health workforce and spending more time with patients than  
33 any other medical professionals [20]. According to the data from the latest China  
34 Health Statistics Yearbook issued by the National Health Commission of the People’s  
35 Republic of China, as of the end of 2020, the number of nurses in China reached 4.7  
36 million, accounting for 44.1% of the total number of healthcare professionals [21]. In  
37 theory, patient experience with nursing care, as a process indicator, reflects  
38 interactions between patients and nurses and has an important impact on overall  
39  
40  
41  
42  
43  
44  
45  
46  
47  
48  
49  
50  
51  
52  
53  
54  
55  
56  
57  
58  
59  
60

1  
2  
3  
4 satisfaction with hospital care [22, 23]. In the study of Bjertnaes [18], thirteen  
5  
6 variables were significantly associated with overall patient satisfaction with hospitals,  
7  
8 and the results of the regression model showed that the most important predictor of  
9  
10 patient satisfaction with hospitals was patient experiences with nursing care. Similarly,  
11  
12 Schmidt found that the perception of nursing care received was the only significant  
13  
14 predictor of overall satisfaction with the hospital experience [24].

15  
16 However, in terms of using these patient experience data to improve nursing care,  
17  
18 existing studies have not offered enough feedback due to the low representation of  
19  
20 nursing care in these patient experience surveys [17, 18]. Most patient experience  
21  
22 scales include a limited number of items related to nursing and fail to provide  
23  
24 thorough and detailed insight into nursing care from patients' perspectives. For  
25  
26 instance, the study of Bjertnaes [18] included only 4 items related to nursing care, and  
27  
28 the study of Min [12] included only 2 items related to nursing care. Therefore, to what  
29  
30 extent patient experience with nursing care explains satisfaction with the health-care  
31  
32 system remains unclear.

33  
34 We hypothesize that patient experience with nursing care accounts for a  
35  
36 considerable portion of the unexplained variation in health system satisfaction after  
37  
38 adjustments for the demographic profile, health and organizational factors with which  
39  
40 patient satisfaction is usually associated. Understanding the association between  
41  
42 patient experience with nursing care and patient satisfaction may help in utilizing the  
43  
44 results to improve nursing services, resulting in better patient satisfaction. Therefore,  
45  
46 the purpose of this study was to determine how patient experience with nursing care  
47  
48 influence satisfaction among patients.

## 48 **2 Methods**

### 49 **2.1 Design**

50  
51 This study is a cross-sectional survey and is reported according to the 'The  
52  
53 Strengthening the Reporting of Observational Studies in Epidemiology (STROBE)  
54  
55 Statement for reporting observational studies' obtained from the EQUATOR Network  
56  
57 website [25].  
58  
59

### 60 **2.2 Setting**

1  
2  
3  
4 Inpatients were consecutively recruited from July 2020 to August 2020 in Zhongshan  
5 Hospital of Fudan University, which is the largest academic hospital (with 2000 beds)  
6 in Shanghai, China.  
7  
8

### 9 **2.3 Sample and participants**

10  
11 We calculated the sample size according to the requirements for multivariate analysis,  
12 which demands the sample size be 5-10 times the number of variables [26]. There  
13 were 33 items in the questionnaire and 22 patients and organizational characteristics.  
14 Therefore, the sample size was required to be 660 with an estimated 20% nonresponse  
15 rate. During the study period, a total of 767 inpatients were eligible to participate in  
16 the study, seven patients refused to participate (0.9%), and four patients'  
17 questionnaires were incomplete (0.5%). Finally, 756 patients (98.6%) were analyzed.  
18 The inclusion criteria were as follows: (1) hospitalized for 2 days or more; (2) able to  
19 read and understand Chinese; and (3) aged 18 years old or above. Patients with mental  
20 health problems, such as dementia, schizophrenia, and severe depression, were  
21 excluded. Eligible patients were invited to participate in the study. When a patient  
22 showed an interest in participating, a recruitment letter explaining the aim, process,  
23 and ethical considerations of this study was sent to them. To gain a broad and  
24 representative understanding of the patient experience, we varied the recruitment  
25 sites. A total of 36 wards were included, including 16 internal medical wards and 20  
26 surgical wards, followed by cardiology, hepatology, respiratory department,  
27 gastroenterology, hematology, oncology, nephrology, orthopedics, urology,  
28 neurology, obstetrics and gynecology, endocrinology, otorhinolaryngology, and  
29 hepatobiliary surgery department, from each of which accounted for at least three  
30 percent of the patients in our sample.  
31  
32  
33  
34  
35  
36  
37  
38  
39  
40  
41  
42  
43  
44  
45  
46  
47  
48  
49

### 50 **2.4 Measures**

#### 51 **Patient characteristics**

52 The following characteristics were collected: age, gender, ethics, religion, educational  
53 level, household monthly income per capita, family residence, medical assurance,  
54 primary caregiver, primary disease diagnosis, number of admissions within one year,  
55 and length of hospital stay. The section for disease diagnosis consisted of ten  
56  
57  
58  
59  
60

1  
2  
3  
4 categories: (1) cardiovascular diseases, (2) pulmonary diseases, (3) diseases of the  
5 digestive system, (4) diseases of the musculoskeletal system, (5) endocrine/metabolic  
6 diseases, (7) diseases of ophthalmology, (8) diseases of the  
7 urinary system, (9) diseases of the hematological system, and (10) other diseases,  
8 including allergies.  
9  
10  
11  
12

### 13 **Patient experience with nursing care**

14  
15 Patient experience with nursing care was measured by the inpatient experience of  
16 nursing care questionnaire, which was self-designed to evaluate patients' perceptions  
17 of quality of nursing care in Chinese hospitals. After a scoping review of current  
18 research results concerning patient experience with nursing care, 15 semi-structured  
19 in-depth interviews with 8 men and 7 women were conducted to obtain insights into  
20 patient-perceived important elements of nursing care. Example questions are 'What  
21 aspects of nursing care do you feel are important?' and 'What do you see as the nurses'  
22 role when you receive health services?'. The draft items of the questionnaire were  
23 generated by interviews and literature analysis. Then, to select the most suitable items  
24 to be retained in the questionnaire, the content validity of the items was evaluated by  
25 15 experts in the fields of patient management and quality of care, and items were  
26 deleted if the content validity index was less than 0.8. Finally, we conducted a pilot  
27 survey and found the Cronbach's  $\alpha$  of the questionnaire was 0.84, and the split-half  
28 reliability was 0.75.  
29  
30  
31  
32  
33  
34  
35  
36  
37  
38  
39  
40  
41  
42

43 The final questionnaire consisted of 33 items assessing 8 dimensions of patients'  
44 perception of nursing care (Online Supplemental Material 1): (1) Coordination of care  
45 (3 items), e.g., the process of admission. (2) Physical environment (3 items), e.g., the  
46 cleanliness of the ward. (3) Information and education (7 items), e.g., the information  
47 about how to conduct scientific lifestyles. (4) Emotional support (4 items), e.g., nurses'  
48 response to patients' anxiety and fear. (5) Technical competencies (2 items), e.g.,  
49 proficiency in performing nursing procedures. (6) Monitoring the progress of diseases  
50 (4 items), e.g., monitoring the vital signs. (7) Responding requests (3 items), e.g., the  
51 waiting time after pressing the call button. (8) Patient safety and privacy protection (7  
52 items), e.g., treating patients' information confidentially. Most of the items were  
53  
54  
55  
56  
57  
58  
59  
60

1  
2  
3  
4 assessed by a 5-point Likert scale ranging from “never” to “always”, where ‘never’ =  
5 1, ‘occasionally’ = 2, ‘sometimes’ = 3, ‘usually’ = 4, and ‘always’ = 5. Response  
6 options ranged from “strongly disagree” and “strongly agree” for the admission  
7 process and discharge plan. For each item, the patients were offered the option of  
8 indicating whether it was *not relevant*. Each dimension score was determined by  
9 adding the scores of all items that corresponded to that dimension and dividing it by  
10 the number of items. The total inpatient experience score was the mean of all 8  
11 dimension scores.  
12

### 13 **Patient satisfaction**

14  
15 The overall patient satisfaction question was ‘All in all, were you satisfied with the  
16 care and treatment you received at the hospital?’, with a ten-point response option  
17 ranging from 1-10 (with 1 labeled “not at all satisfied” and 10 labeled “to a very large  
18 extent satisfied”).  
19

### 20 **2.5 Data Collection**

21  
22 Eligible patients were invited to participate in the study. After informed consent was  
23 given, all data were obtained by trained investigators. Characteristics included in the  
24 hospital information system, such as gender, age, and diagnosis, were collected by  
25 checking the information system, while characteristics related to family income,  
26 literacy level and number of hospital admissions were assessed by interviewing  
27 patients and their family members. The timing of collecting the patients’ feedback  
28 may affect their response to the questionnaires because some of them may worry that  
29 negative appraisals about their hospital experience and satisfaction would affect the  
30 treatment and care they received during hospitalization, and thus they might be  
31 unwilling to provide negative feedback. To encourage the participants to respond  
32 frankly, the patient experience with nursing care survey and the overall patient  
33 satisfaction survey were taken on the patients’ discharge day, and the nursing staff did  
34 not administer the survey.  
35  
36  
37  
38  
39  
40  
41  
42  
43  
44  
45  
46  
47  
48  
49  
50  
51  
52  
53  
54  
55

### 56 **2.6 Data analysis**

57  
58 Statistical analyses were conducted using IBM-SPSS software version 22 (IBM Corp.,  
59 Armonk, NY, USA), Empower (R) (www.empowerstats.com, X&Y solutions, Inc.,  
60



1  
2  
3  
4 Boston, MA), and R statistical software. Descriptive analysis was performed for  
5 participants' characteristics and their responses to items about satisfaction and  
6 experience. Values were expressed as the mean and standard deviation for continuous  
7 variables or percentages for categorical variables. Multiple regression models were  
8 used to analyze the effects of patient experience with nursing care and other variables  
9 on the overall patient satisfaction. Independent variables were selected based on  
10 evidence in previous studies [6-8] showing a significant relation to overall patient  
11 satisfaction and we also included other variables based on our clinical experience. To  
12 ensure the stability of the model, and determine whether the relationship between  
13 patient experience with nursing care and patient overall satisfaction would be  
14 weakened after adjusting different variables, we chose different kinds of variables into  
15 the model successively. Model 1 was adjusted for age, sex, residence, literacy level,  
16 household monthly income per capita, type of medical assurance; model 2 was  
17 adjusted for age, sex, residence, literacy level, household monthly income per capita,  
18 type of medical assurance, diagnosis, number of admissions within one year, length of  
19 hospital stay. We also conducted the subgroup analyses test whether the relationship  
20 between patient experience with nursing care and overall patient satisfaction was  
21 valid among different populations. Non-ordinal categorical variables and ordinal  
22 categorical variables with non-equidistant data were transformed into dummy  
23 variables. The probability was considered significant when  $p < .05$ . No missing data  
24 imputation methods were used.

## 25 26 27 28 29 30 31 32 33 34 35 36 37 38 39 40 41 42 43 44 45 **2.7 Patient and Public Involvement statement**

46 It was not appropriate or possible to involve patients or the public in the design, or  
47 conduct, or reporting, or dissemination plans of our research.

## 50 51 52 53 54 55 56 57 58 59 60 **3 Results**

### **Sociodemographic and clinical characteristics of the study participants**

54 A total of 756 participants with a mean age of 57.7 years were recruited. Of these,  
55 61.5% (465/756) were male, and 39.9% (302/756) were diagnosed with cancer. The  
56 detailed demographic and clinical characteristics of the participants are shown in  
57 Table 1.

### **Patient experience with nursing care**

The total patient experience score was 4.54 (0.37). The scores of each item are presented in Table 2. The lowest scores were related to ‘information and communication’ (4.34±0.52), ‘coordination of care’ (4.42±0.53) and ‘emotional support’ (4.56±0.45). Patients had better experiences with ‘patient safety and privacy protection’ (4.65±0.39), ‘technical competencies’ (4.64±0.38) and ‘responding requests’ (4.63±0.41).

### **Patient satisfaction with hospital services**

The overall patient satisfaction item was skewed toward a positive assessment: 9.2 on a scale of 1-10, where 10 represents the best score. Of those who responded, 52.0% were satisfied with the hospital services to a very large extent. Only 1.9% reported being satisfied to only a small extent, and 0.3% were not at all satisfied with the hospital services.

### **Relationships between patient experience with nursing care and overall patient satisfaction**

A linear relationship between the patient experience of nursing care and overall patient satisfaction was observed after adjusting for age, sex, household monthly income per capita, literacy level, residence, medical insurance, length of hospital stay, number of admissions within one year, and primary diagnosis (Fig. 1). Table 3 presents the results of multivariate regression for the effects of patient experience with nursing care on the patients’ overall satisfaction with hospital services. The patient experience with nursing care was significantly associated with overall satisfaction in the crude model and in the adjusted models. Even after adjusting for 6 sociodemographic and 3 disease-related factors in model 2, the patient experience with nursing care was still significantly associated with overall patient satisfaction ( $\beta=1.257$ , adjusted  $R^2= 34.9\%$ ,  $p<0.001$ ).

### **Subgroup analysis of the relationship between patient experience with nursing care and overall patient satisfaction**

The subgroup analysis is presented in Figure 2. No significant heterogeneity was found among analysed subgroups stratified according to age, sex, residence, literacy

1  
2  
3  
4 level, household monthly income per capita, type of medical assurance, primary  
5 diagnosis, number of admissions within one year, and length of hospital stay.  
6

#### 7 **4 Discussion**

8  
9 The aim of our study was to analyze the effects of patient experience with nursing  
10 care on overall patient satisfaction. The results showed a linear relationship between  
11 patient experience with nursing care and overall patient satisfaction after the  
12 adjustment for age, sex, family monthly income, educational level, residence, medical  
13 insurance, length of hospital stay, number of admissions, primary diagnosis (Fig. 1).  
14 The patient experience with nursing care explained 34.9% of the variance in overall  
15 patient satisfaction. This finding was consistent with previous studies [24, 27], which  
16 showed that the most important predictor of patient satisfaction with hospitals was  
17 patient experience with nursing care. The variance in overall patient satisfaction that  
18 patient experience with nursing care explained in our study was larger than that in  
19 study of Bjertnaes [18]. The possible reason may be the different tools we used. The  
20 study of Bjertnaes [18] included only 4 items relating to nursing and had low  
21 representation of nursing care, failing to provide thorough and detailed insight into  
22 nursing care from the patients' perspectives, while our study developed and used a  
23 questionnaire of patient experience with nursing care through patient interviews,  
24 literature analysis, and expert consultation, which consisted of 33 items assessing 8  
25 dimensions of the patients' perception of nursing care and had good validity and  
26 reliability. Therefore, the survey tool used in our study had a high representation of  
27 patient-perceived nursing care.  
28  
29

30  
31 To our knowledge, this is the first study in China to survey patient experience with  
32 nursing care and to analyze its relationship with overall patient satisfaction. Recently,  
33 there has been a growing interest in using patient experience to assess and improve  
34 the performance of the healthcare system in China [11]. However, nursing seems to  
35 be overlooked in this growing trend [28]. Our study showed that patients had better  
36 experiences with 'patient safety and privacy protection', 'technical competencies' and  
37 'responding requests'. The year of 2021 is the 11th anniversary of the launch of  
38 Quality Care Demonstration Project by the Chinese government, aiming at improving  
39  
40  
41  
42  
43  
44  
45  
46  
47  
48  
49  
50  
51  
52  
53  
54  
55  
56  
57  
58  
59  
60

1  
2  
3  
4 satisfaction of patients, society, and government through high-quality nursing care  
5 [29]. Driven by the implementation of the 'high-quality care project', Chinese nursing  
6 services have continued to be improved regarding patients' physical care.  
7  
8

9  
10 However, there should be recognition of the potential need for psychological and  
11 emotional support, as well as of the importance of meeting communication and  
12 information needs. The result of our study showed that patients had worse experience  
13 with 'information and communication', 'coordination of care' and 'emotional  
14 support', which was consistent with study of Senarat [30]. As patients' healthcare  
15 demands increase, they are no longer satisfied with passively receiving care; instead,  
16 they are eager to become fully involved in the treatment and recovery process [31].  
17 Additionally, nurses spend the most time with them among all medical professionals.  
18 In addition to direct care providers, nurses are also expected to act as navigators  
19 coordinating all aspects of care and promoting patient-centered care. Therefore,  
20 coordination of care is a fundamental and core value of nursing care, a predictor of  
21 quality and a known predictor of patient satisfaction with healthcare [32]. Humanistic  
22 care is an indispensable characteristic of nursing services. Numerous studies have  
23 demonstrated that patients' health outcomes can be improved much more significantly  
24 when caring behaviors are performed with empathy and compassion [33, 34]. The  
25 study of Karam [15] also showed that tactics alone, such as bedside shift reports,  
26 health education, and follow-up phone calls after discharge, were insufficient, while  
27 meaningful strategies to create a positive organizational culture were vital drivers to  
28 promote a successful patient experience. However, most healthcare institutions in  
29 China are task-oriented, and the delivery of nursing care is streamlined with  
30 standardized processes, protocols, and paths. These practices result in the fragmented  
31 nursing care, and patients receive less psychological care and more technical care  
32 from nurses, which negatively influences patient experience. Efforts should be made  
33 by hospital administrators and nursing managers to overcome the tendency to  
34 streamline the care delivery by standardized processes and determine how these  
35 patient-perceived attributes of nursing care can be developed and rooted in the daily  
36 practice through organizational changes, culture shaping and staff education.  
37  
38  
39  
40  
41  
42  
43  
44  
45  
46  
47  
48  
49  
50  
51  
52  
53  
54  
55  
56  
57  
58  
59  
60

1  
2  
3  
4 Compared to the other determinants that influence overall patient satisfaction with  
5 hospital services, such as the reputation and the image of hospitals, education and  
6 socioeconomic status of the patients, and length of stay [6], patient experience with  
7 nursing care is amendable and actionable. For instance, organizing an afternoon ward  
8 round by nurses to address the communication needs of patients and hanging a poster  
9 to share patient feedback with the medical team have been proven to be efficient ways  
10 to facilitate good experiences with communication [35]. Understanding the  
11 importance of patient experience with nursing care would enable nursing managers  
12 and nursing practitioners to have a better understanding of current problems with  
13 healthcare delivery, push for continuous improvement, redesign the delivery of  
14 services and help professionals reflect on their practice.

### 25 **Limitations**

26  
27 This was a single-center study and our findings therefore may not be generalized.  
28 However, our hospital is a national large general hospital and the nursing services  
29 model has a leading role around the country, therefore, for the Chinese region, our  
30 results can be regarded as representative to a considerable extent. Moreover, even  
31 though we had consider several variables which are likely related to patient outcomes,  
32 we might have omitted other hospital-unit-related characteristics, such as the  
33 organization's patient-centered culture and nurses' practice environment. These  
34 variables were not available in our data sample but might be associated with patient  
35 experience with nursing care and also have an effect on overall patient satisfaction.  
36 Further researches are needed to analyze the external factors that could have  
37 influenced patient experience with nursing care.

### 50 **Conclusion**

51  
52 This study provides the first evidence of the importance of nursing care in improving  
53 overall patient satisfaction, and demonstrates that nurses have the huge potential to  
54 contribute to the patient-centered healthcare system and nursing should be more  
55 involved in the healthcare quality improvement. Understanding the importance of  
56 patients' perception of nursing services delivery would enable nursing managers and  
57  
58  
59  
60

nursing practitioners to have better understanding of current problems with healthcare delivery, push for continuous improvement, redesign the delivery of services and help professionals reflect on practice modern.

### **Contribution statement**

Xiao CHEN and Yuxia ZHANG contributed to the study conception and design. Material preparation, data collection and analysis were performed by Xiao CHEN, Yuxia ZHANG, Wei QIN, Zhenghong YU, Jingxian YU, Ying LIN, Xiaorong LI, Zheng ZHENG, and Ying WANG. The first draft of the manuscript was written by Xiao CHEN and Yuxia ZHANG, Wei QIN, Zhenghong YU, Jingxian YU, Ying LIN, Xiaorong LI, Zheng ZHENG, and Ying WANG commented on and revised previous versions of the manuscript. All authors read and approved the final manuscript, and agreed to be accountable for all aspects of the work in ensuring that questions related to the accuracy or integrity of any part of the work were appropriately investigated and resolved.

### **Competing interest**

- We had no associations with commercial entities that provided support for the work reported in the submitted manuscript.
- We had no associations with commercial entities that could be viewed as having an interest in the general area of the submitted manuscript.
- We had no similar financial associations involving their spouse or their children under 18 years of age.
- We had no Non-financial associations that may be relevant to the submitted manuscript

### **Funding**

This work was supported by the Zhongshan hospital of Fudan University under Award Number 20208ZSFZ02, and the funder had no role in the design of the study, the collection or analysis of data, or the decision to publish.

### **Ethical statement**

The study was approved by the Ethics Committee of Zhongshan hospital of Fudan university (Approval number B2020-074) and was performed in accordance with the

1  
2  
3  
4 ethical standards of the 1964 Declaration of Helsinki and its later amendments. Prior  
5 to data collection, all participants were informed of the purpose of this study and  
6 signed written consent forms were obtained to inform them of the rights, risks, and  
7 advantages of participation.  
8  
9  
10

### 11 **Data sharing**

12  
13 Data are available on the Dryad repository and the DOI number is  
14 <https://doi.org/10.5061/dryad.qfttdz0jg>  
15  
16  
17  
18  
19  
20  
21  
22  
23  
24  
25  
26

### 27 **References**

- 28  
29 [1] Donabedian A. The quality of care: How can it be assessed?. JAMA,  
30 1988,260(12):1743-1748.  
31  
32 [2] Zamora D. Using Patient Satisfaction as a Basis for Reimbursement: Political,  
33 Financial, and Philosophical Implications. *Creat nurs*, 2012,18(3):118-123.  
34  
35 [3] Hospital value-based purchasing. Centers for Medicare & Medicaid Services.2  
36 015.[https://www.cms.gov/Outreach-and-Education/Medicare-Learning-Network-MLN/MLNProducts/Downloads/Hospital\\_VBPurchasing\\_Fact\\_Sheet\\_ICN907664.pdf](https://www.cms.gov/Outreach-and-Education/Medicare-Learning-Network-MLN/MLNProducts/Downloads/Hospital_VBPurchasing_Fact_Sheet_ICN907664.pdf).  
37  
38 Accessed 22 Dec 2020.  
39  
40 [4] Schneider J, Kaplan SH, Greenfield S, et al. Better physician-patient relationships  
41 are associated with higher reported adherence to antiretroviral therapy in patients with  
42 HIV infection. *J Gen Intern Med*, 2004,19(11):1096-1103.  
43  
44 [5] Hill MH, Doddato T. Relationships among patient satisfaction, intent to return,  
45 and intent to recommend services provided by an academic nursing center. *J cult*  
46 *divers*, 2002,9(4):108.  
47  
48 [6] National Health and Family Planning Commission. Announcement of  
49 implementing the National healthcare improvement initiative, 2015. Available:  
50 <http://www.nhc.gov.cn/yzygj/s3593g/201501/5584853cfa254d1aa4e38de0700891fa.s>  
51  
52  
53  
54  
55  
56  
57  
58  
59  
60

1  
2  
3  
4 html. Accessed 1 October 2020.

5 [7] Batbaatar E, Dorjdagva J, Luvsannyam A, et al. Determinants of patient  
6 satisfaction: a systematic review. *Perspect Public Health*, 2017,137(2):89-101.

7  
8 [8] Chang E, Hancock K, Chenoweth L, et al. The influence of demographic variables  
9 and ward type on elderly patients' perceptions of needs and satisfaction during acute  
10 hospitalization. *Int J Nurs Pract*, 2003,9(3):191-201.

11  
12 [9] Mangelsdorff AD, Finstuen K. Patient satisfaction in military medicine: status and  
13 an empirical test of a model. *Mil med*, 2003,168(9):744-749.

14  
15 [10] Harris-Haywood S, Sylvia-Bobiak SN, Stange KC, Flocke SA. The association  
16 of how time is spent during outpatient visits and patient satisfaction: are there racial  
17 differences? *J Natl Med Assoc*, 2007,99(9):1061-5.

18  
19 [11] Coroneos CJ, Lin YL, Sidey-Gibbons C, Asaad M, Chin B, Boukovalas S,  
20 Roubaud MS, Miggins M, Baumann DP, Offodile AC 2nd. Correlation Between  
21 Financial Toxicity, Quality of Life, and Patient Satisfaction in an Insured Population  
22 of Breast Cancer Surgical Patients: A Single-Institution Retrospective Study. *J Am  
23 Coll Surg*. 2021 Mar;232(3):253-263.

24  
25 [12] Min R, Li L, Zi C, et al. Evaluation of patient experience in county-level public  
26 hospitals in China: a multicentred, cross-sectional study. *BMJ Open*,  
27 2019,9(11):e34225.

28  
29 [13] Greenslade JH, Jimmieson NL. Organizational factors impacting on patient  
30 satisfaction: a cross sectional examination of service climate and linkages to nurses'  
31 effort and performance. *Int J Nurs Stud*, 2011,48(10):1188-1198.

32  
33 [14] Ahmed F, Burt J, Roland M. Measuring patient experience: concepts and  
34 methods. *Patient*, 2014,7(3):235-241.

35  
36 [15] Karam, C. The Evolution of Patient Satisfaction to Patient Experience. *Frontiers  
37 of health services management*, 2017. 33(3)30-34

38  
39 [16] Bleich S. How does satisfaction with the health-care system relate to patient  
40 experience? *Bull World Health Organ*, 2009,87(4):271-278.

41  
42 [17] Park C, Zakare-Fagbamila RT, Dickson W, et al. The limited influence of  
43 neurosurgeons' behavior on inpatient satisfaction: a retrospective multihospital  
44  
45  
46  
47  
48  
49  
50  
51  
52  
53  
54  
55  
56  
57  
58  
59  
60



1  
2  
3  
4 analysis. *J Neurosurg*, 2020,31:1-7.

5 [18] Bjertnaes OA, Sjetne IS, Iversen HH. Overall patient satisfaction with hospitals:  
6 effects of patient-reported experiences and fulfilment of expectations. *BMJ Qual Saf*,  
7 2011,21(1):39-46.

8  
9  
10  
11 [19] *The Lancet*. 2020: unleashing the full potential of nursing. *The Lancet*,  
12 2019,394(10212):1879.

13  
14 [20] Nursing and midwifery. World Health Organization. 2020. <https://www.who.int/news-room/fact-sheets/detail/nursing-and-midwifery>. Accessed 22 Dec 2020.

15  
16 [21] The National Health Commission of the People's Republic of China. *China  
17 a Health Statistics Yearbook*[M]. Beijing: China Union Medical College Press,  
18 2021.

19  
20 [22] Kutney-Lee A, McHugh MD, Sloane DM, et al. Nursing: A Key To Patient  
21 Satisfaction. *Health Aff*, 2009,28(Supplement 3):w669-w677.

22  
23 [23] Desborough J, Phillips C, Mills J, et al. Developing a positive patient experience  
24 with nurses in general practice: An integrated model of patient satisfaction and  
25 enablement. *J Adv Nurs*, 2018,74(3): 564-578.

26  
27 [24] Schmidt LA. Patients' perceptions of nurse staffing, nursing care, adverse events,  
28 and overall satisfaction with the hospital experience. *Nurs Econ*, 2004,22(6):295-306,  
29 291.

30  
31 [25] von Elm E, Altman DG, Egger M, et al. The Strengthening the Reporting of  
32 Observational Studies in Epidemiology (STROBE) Statement: Guidelines for  
33 reporting observational studies. *Int J Surg*, 2014,12(12):1495-1499.

34  
35 [26] Chen B, Sample Size Methodology for Multivariate Analysis—Synthetic  
36 Estimate Method for Sample Size in Multivariate Analysis[J]. *Injury Medicine*.  
37 2012,1(4): 58-60.

38  
39 [27] Desborough J, Bagheri N, Banfield M, et al. The impact of general practice  
40 nursing care on patient satisfaction and enablement in Australia: A mixed methods  
41 study. *Int J Nurs Stud*, 2016,64:108-119.

42  
43 [28] Zhang Y, Li Q, Liu H. From patient satisfaction to patient experience: A call to  
44 action for nursing in China. *J Nurs Manag*, 2020,28(2):450-456.

[29] The Central People's Government of the People's Republic of China. (2010). [The Ministry of Health printed and distributed the working standards for implementing quality nursing care service in hospitals (Trial)]. Retrieved from [http://www.gov.cn/gzdt/2010-12/23/content\\_1771819.htm](http://www.gov.cn/gzdt/2010-12/23/content_1771819.htm). Accessed 1 October 2020.

[30] Senarat U, Gunawardena NS. Development of an Instrument to Measure Patient Perception of the Quality of Nursing Care and Related Hospital Services at the National Hospital of Sri Lanka. *Asian Nurs Res*, 2011,5(2):71-80.

[31] Cheraghi MA, Esmaeili M, Salsali M. Seeking Humanizing Care in Patient-Centered Care Process: A Grounded Theory Study. *Holist nurs pract*, 2017,31(6):359-368.

[32] Davey A, Carter M, Campbell JL. Priorities for young adults when accessing UK primary care: literature review. *Prim Health Care Res Dev*, 2013,14(4):341-349.

[33] Del Canale S, Louis DZ, Maio V, et al. The relationship between physician empathy and disease complications: an empirical study of primary care physicians and their diabetic patients in Parma, Italy. *Academic medicine : journal of the Association of American Medical Colleges*, 2012,87(9):1243-1249.

[34] Derksen F, Bensing J, Lagro-Janssen A. Effectiveness of empathy in general practice: a systematic review. *Br J Gen Pract*. 2013 Jan;63(606):e76-84.

[35] Sheard L, Marsh C, Mills T, et al. Using patient experience data to develop a patient experience toolkit to improve hospital care: a mixed-methods study. Southampton (UK): NIHR Journals Library, 2019.

**Table 1 Socio-demographic and clinical characteristics of study participants**

| Characteristics             | Value      |
|-----------------------------|------------|
| <b>Sex, n(%)</b>            |            |
| Male                        | 465, 61.5% |
| Female                      | 291, 38.5% |
| <b>Age, mean±SD</b>         | 57.7±14.5  |
| <b>Marital status, n(%)</b> |            |
| Single                      | 41, 5.4%   |
| Ever married                | 715, 94.6% |

**Literacy level, n(%)**

|                            |            |
|----------------------------|------------|
| Primary education or below | 109, 14.4% |
| Secondary education        | 454, 60.1% |
| College education or above | 193, 25.5% |

**Household monthly income per capita, n(%)**

|               |            |
|---------------|------------|
| <5000 RMB     | 288, 38.1% |
| 5000-9999 RMB | 293, 38.8% |
| >10000 RMB    | 175, 23.1% |

**Main source of medical expense, n(%)**

|                              |            |
|------------------------------|------------|
| Urban medical insurance      | 505, 66.8% |
| Rural medical insurance      | 163, 21.6% |
| Commercial medical insurance | 8, 1.0%    |
| Personal funds               | 80, 10.6%  |

**Residence, n(%)**

|                          |          |
|--------------------------|----------|
| Rural areas              | 204, 27% |
| Urban areas              | 416, 55% |
| Rural-urban fringe areas | 136, 18% |

**Diagnosed with cancer, n(%)**

|     |            |
|-----|------------|
| Yes | 302, 39.9% |
| No  | 454, 60.1% |

**Number of hospital admissions within 1 year, n(%)**

|    |            |
|----|------------|
| 1  | 457, 60.4% |
| 2  | 121, 16.0% |
| 3  | 58, 7.7%   |
| >3 | 120, 15.9% |

**Units type, n(%)**

|                             |           |
|-----------------------------|-----------|
| Cardiology                  | 78, 10.3% |
| Hepatology                  | 72, 9.5%  |
| Respiratory department      | 65, 8.6%  |
| Gastroenterology            | 64, 8.5%  |
| Hematology                  | 53, 7.0%  |
| Oncology                    | 53, 7.0%  |
| Nephrology                  | 51, 6.7%  |
| Orthopedics                 | 46, 6.1%  |
| Urology                     | 44, 5.8%  |
| Neurology                   | 43, 5.7%  |
| Obstetrics and gynecology   | 39, 5.2%  |
| Thoracic surgery department | 37, 4.9%  |

1  
2  
3  
4  
5  
6  
7  
8  
9  
10  
11  
12  
13  
14  
15  
16  
17  
18  
19  
20  
21  
22  
23  
24  
25  
26  
27  
28  
29  
30  
31  
32  
33  
34  
35  
36  
37  
38  
39  
40  
41  
42  
43  
44  
45  
46  
47  
48  
49  
50  
51  
52  
53  
54  
55  
56  
57  
58  
59  
60

|                                  |          |
|----------------------------------|----------|
| Endocrinology                    | 35, 4.6% |
| Otorhinolaryngology              | 28, 3.7% |
| hepatobiliary surgery department | 27, 3.6% |
| Breast department                | 21, 2.8% |

---

For peer review only

**Table 2 Percentage distribution of items for experience with nursing care in participants (n, %)**

| Domain                               | Items                                                                        | Never/Strongly disagree | Occasionally/ Disagree | Sometimes/ Neutral | Often/ Agree | Always/Strongly Agree |
|--------------------------------------|------------------------------------------------------------------------------|-------------------------|------------------------|--------------------|--------------|-----------------------|
| <b>Coordination of care</b>          | Nurses provided well-organized admission process                             | 0(0.0%)                 | 5(0.7%)                | 31(4.1%)           | 317(41.9%)   | 403(53.3%)            |
|                                      | Nurses informed me about who are responsible for my treatment and care       | 0(0.0%)                 | 2(0.3%)                | 37(4.9%)           | 299(39.6%)   | 418(55.2%)            |
|                                      | Nurses provided well-organized discharge plan                                | 3(0.4%)                 | 7(0.9%)                | 89(11.8%)          | 336(44.4%)   | 321(42.5%)            |
| <b>Physical environment</b>          | Nurses provided a clean ward environment                                     | 4(0.5%)                 | 2(0.3%)                | 15(2.0%)           | 281(37.2%)   | 454(60.1%)            |
|                                      | Nurses provided a quiet ward environment                                     | 4(0.5%)                 | 7(0.9%)                | 24(3.2%)           | 251(33.2%)   | 470(62.2%)            |
|                                      | Nurses provided an ordered ward environment                                  | 2(0.3%)                 | 6(0.8%)                | 26(3.4%)           | 246(32.5%)   | 476(63.0%)            |
| <b>Information and communication</b> | Nurses informed me about usage, dosage and side effects of medicines         | 0(0.0%)                 | 0(0.0%)                | 14(1.9%)           | 347(45.9%)   | 395(52.2%)            |
|                                      | Nurses helped me better know the disease                                     | 0(0.0%)                 | 1(0.1%)                | 70(9.3%)           | 393(52.0%)   | 292(38.6%)            |
|                                      | Nurses informed me about results of tests                                    | 14(1.9%)                | 110(14.5%)             | 145(19.2%)         | 382(50.5%)   | 105(13.9%)            |
|                                      | Nurses provided information about the appropriate dietary                    | 0(0.0%)                 | 2(0.3%)                | 64(8.5%)           | 314(41.5%)   | 376(49.7%)            |
|                                      | Nurses provided information about disease recovery                           | 0(0.0%)                 | 1(0.1%)                | 28(3.7%)           | 276(36.5%)   | 451(59.7%)            |
|                                      | Nurses provided health information through multiple routes                   | 0(0.0%)                 | 0(0.0%)                | 30(4.0%)           | 272(35.9%)   | 454(60.1%)            |
|                                      | Nurses provided relevant instructions before implementing medical procedures | 0(0.0%)                 | 16(2.1%)               | 27(3.6%)           | 331(43.8%)   | 382(50.5%)            |

Table 2 Percentage distribution of items for experience with nursing care in participants (continued)

| Domain                                     | Items                                                                                                                               | Never/Strongly disagree | Occasionally/ Disagree | Sometimes/ Neutral | Often/ Agree | Always/Strongly Agree |
|--------------------------------------------|-------------------------------------------------------------------------------------------------------------------------------------|-------------------------|------------------------|--------------------|--------------|-----------------------|
| <b>Emotional support</b>                   | Nurses treated me patiently                                                                                                         | 0(0.0%)                 | 1(0.1%)                | 14(1.9%)           | 288(38.1%)   | 453 (59.9%)           |
|                                            | Nurses treated me with respect                                                                                                      | 0(0.0%)                 | 2(0.3%)                | 4(0.5%)            | 239(31.6%)   | 511 (67.6%)           |
|                                            | Nurses' behaviors made me feel cared for                                                                                            | 0(0.0%)                 | 0(0.0%)                | 38(5.0%)           | 298(39.4%)   | 420(55.6%)            |
|                                            | Nurses helped me manage the anxiety, stress, fears I had about my illness                                                           | 1(0.1%)                 | 4(0.5%)                | 23(3.0%)           | 307(40.6%)   | 421(55.8%)            |
| <b>Technical competencies</b>              | Nurses were proficient in venipuncture procedures                                                                                   | 0(0.0%)                 | 1(0.1%)                | 5(0.7%)            | 261(35.8%)   | 463(63.4%)            |
|                                            | Nurses were proficient in other nursing procedures, such as intramuscular injection, hypodermic injection, change of dressing, etc. | 0(0.0%)                 | 0(0.0%)                | 3(0.4%)            | 257(34.0%)   | 496(65.6%)            |
| <b>Monitoring the progress of diseases</b> | Nurses made an inspection tour of the ward                                                                                          | 0(0.0%)                 | 2(0.3%)                | 21(2.8%)           | 191(25.3%)   | 542(71.7%)            |
|                                            | Nurses monitored my vital signs timely                                                                                              | 1(0.1%)                 | 3(0.4%)                | 6(0.8%)            | 264(34.9%)   | 482(63.4%)            |
|                                            | Nurses monitored the process of drug treatment                                                                                      | 0(0.0%)                 | 0(0.0%)                | 8(1.1%)            | 243(32.1%)   | 505(66.8%)            |
|                                            | Nurses could recognize my health issues on time                                                                                     | 2(0.2%)                 | 1(0.1%)                | 43(5.7%)           | 300 (39.7%)  | 410(54.2%)            |

Table 2 Percentage distribution of items for experience with nursing care in participants (continued)

| Domain                                        | Items                                                                                                             | Never/Strongly disagree | Occasionally/ Disagree | Sometimes/ Neutral | Often/ Agree | Always/Strongly Agree |
|-----------------------------------------------|-------------------------------------------------------------------------------------------------------------------|-------------------------|------------------------|--------------------|--------------|-----------------------|
| <b>Responding requests</b>                    | Nurses could come and see me in time after pressing the call button                                               | 4(0.5%)                 | 2(0.3%)                | 20(2.6%)           | 88(11.6%)    | 642 (84.9%)           |
|                                               | Nurses dealt with my requests promptly                                                                            | 0(0.0%)                 | 0(0.0%)                | 29(3.8%)           | 304(40.2%)   | 423(56.0%)            |
|                                               | Nurses responded to my suggestions or complaints seriously                                                        | 1(0.1%)                 | 1(0.1%)                | 13(1.7%)           | 280(37.0%)   | 461(61.0%)            |
| <b>Patients safety and privacy protection</b> | Nurses could handle in time when my condition experienced changes                                                 | 0(0.0%)                 | 1(0.1%)                | 13(1.7%)           | 282(37.3%)   | 460(60.8%)            |
|                                               | Nurses informed me about how to prevent the risk events, such as falling and dropping from the bed                | 3(0.4%)                 | 4(0.5%)                | 21(2.8%)           | 251(33.2%)   | 477(63.1%)            |
|                                               | Nurses clearly introduced the use of safety protection equipment, such as the emergency call button in the toilet | 5(0.7%)                 | 2(0.3%)                | 26(3.4%)           | 249(32.9%)   | 474(62.7%)            |
|                                               | Nurses verified my identify when performing nursing procedures                                                    | 1(0.1%)                 | 0(0.0%)                | 1(0.1%)            | 231(30.6%)   | 523(69.2%)            |
|                                               | Nurses applied hand disinfection before performing nursing procedures                                             | 0(0.0%)                 | 1(0.1%)                | 55(7.3%)           | 186(24.6%)   | 514(68.0%)            |
|                                               | Nurses provided protective measures when performing nursing procedures in private body parts                      | 2(0.3%)                 | 0(0.0%)                | 1(0.1%)            | 99(13.1%)    | 654(86.5%)            |
|                                               | Nurses treated my information confidentially                                                                      | 1(0.1%)                 | 4(0.5%)                | 6(0.8%)            | 248(32.8%)   | 497(65.7%)            |

**Table 3 Multivariate regression for effect of patient experience with nursing care on overall patient satisfaction**

| Variable                                          | Crude model            |         |             | Multivariate-adjusted model 1 |         |             | Multivariate-adjusted model 2 |         |             |
|---------------------------------------------------|------------------------|---------|-------------|-------------------------------|---------|-------------|-------------------------------|---------|-------------|
|                                                   | $\beta$ (95% CI)       | P value | P for trend | $\beta$ (95% CI)              | P value | P for trend | $\beta$ (95% CI)              | P value | P for trend |
| Patient experience with nursing care (Continuous) | 1.269<br>(1.150,1.389) | <0.001  |             | 1.273<br>(1.153-1.393)        | <0.001  |             | 1.257<br>(1.138-1.377)        | <0.001  |             |
| Patient experience with nursing care (Tertiles)   |                        |         |             |                               |         |             |                               |         |             |
| T1<br>(3.23-4.45)                                 | 0                      |         | <0.001      | 0                             |         | <0.001      | 0                             |         | <0.001      |
| T2<br>(4.46-4.84)                                 | 0.726<br>(0.609,0.843) | <0.001  |             | 0.778<br>(0.669-0.887)        | <0.001  |             | 0.774<br>(0.665-0.882)        | <0.001  |             |
| T3<br>(4.85-5.00)                                 | 0.964<br>(0.846,1.083) | <0.001  |             | 1.011<br>(0.901-1.121)        | <0.001  |             | 0.995<br>(0.885-1.105)        | <0.001  |             |

Model 1 adjusted for age, sex, residence, literacy level, household monthly income per capita, type of medical assurance; model 2 adjusted for age, sex, residence, literacy level, household monthly income per capita, type of medical assurance, diagnosis, number of admissions, length of hospital stay.



1  
2  
3  
4  
5  
6  
7 **Figure 1 The relationship between patient experience with nursing care and overall patient satisfaction**  
8

9 **Figure 2 Subgroup analysis for effect of patient experience with nursing care on overall satisfaction with hospital services**  
10  
11  
12  
13  
14  
15  
16  
17  
18  
19  
20  
21  
22  
23  
24  
25  
26  
27  
28  
29  
30  
31  
32  
33  
34  
35  
36  
37  
38  
39  
40  
41  
42  
43  
44  
45  
46

For peer review only

1  
2  
3  
4  
5  
6  
7  
8  
9  
10  
11  
12  
13  
14  
15  
16  
17  
18  
19  
20  
21  
22  
23  
24  
25  
26  
27  
28  
29  
30  
31  
32  
33  
34  
35  
36  
37  
38  
39  
40  
41  
42  
43  
44  
45  
46  
47  
48  
49  
50  
51  
52  
53  
54  
55  
56  
57  
58  
59  
60

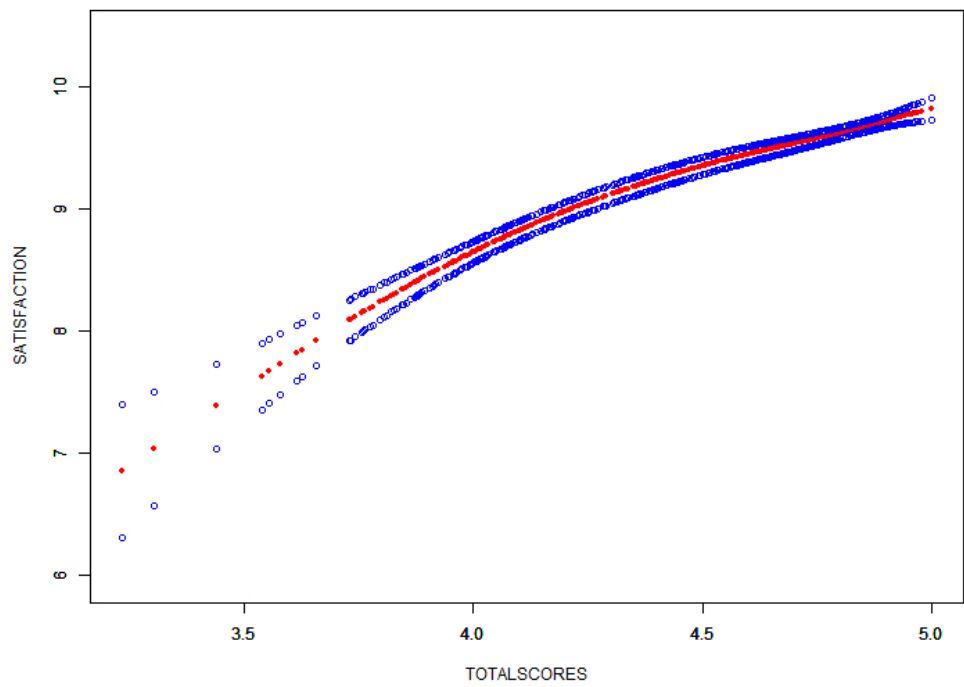

Figure 1 The relationship between patient experience with nursing care and overall patient satisfaction

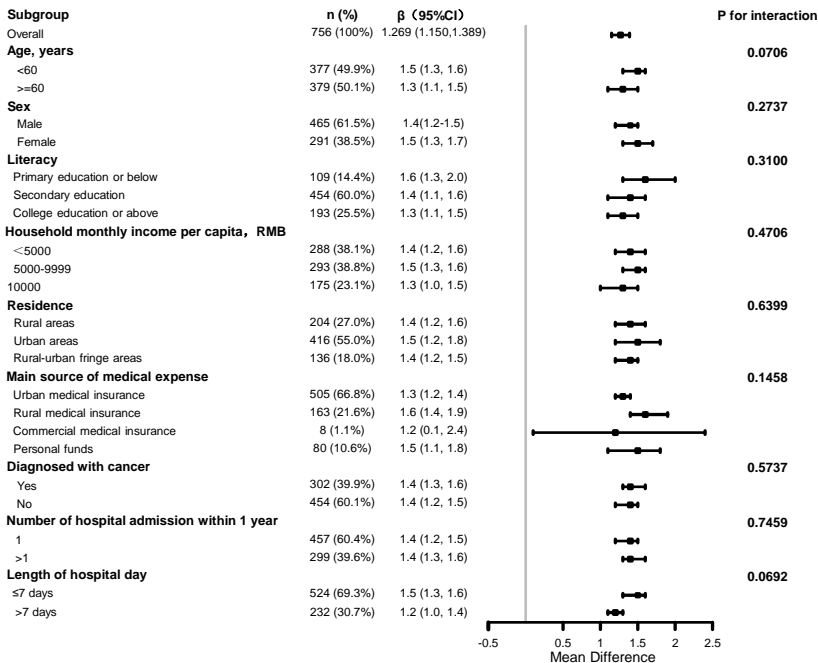

Figure 2 Subgroup analysis for effect of patient experience with nursing care on overall patient satisfaction

## The Inpatient Experience of Nursing Care Survey

### Instructions

This survey is about your experience with nursing care **during this hospitalization stay**, the responses you give will help improve nursing service. Your answers will be confidential and will not be shared with the health professionals who looked after you.

This survey is easy to answer, please read the questionnaire and answer all questions. For each question, please place a tick in the box next to the answer that most closely match your own experience. **If you didn't experience any nursing care, please place a tick in the box next to "not applicable"**.

Thank you for your support.

1、Nurses provided well-organized admission process.

Strongly disagree    Disagree    Neutral    Agree    Strongly agree

2、Nurses informed me about who are responsible for my treatment and care.

Never    Occasionally    Sometimes    Often    Always

3、Nurses provided well-organized discharge plan.

Strongly disagree    Disagree    Neutral    Agree    Strongly agree

4、Nurses provided a clean ward environment.

Never    Occasionally    Sometimes    Often    Always

5、Nurses provided a quiet ward environment.

Never    Occasionally    Sometimes    Often    Always

6、Nurses provided an ordered ward environment.

Never    Occasionally    Sometimes    Often    Always

7、Nurses informed me about usage, dosage and side effects of medicines.

Never    Occasionally    Sometimes    Often    Always    Not applicable

8、Nurses helped me better know the disease.

Never    Occasionally    Sometimes    Often    Always

9、Nurses informed me about results of tests when needed.

Never    Occasionally    Sometimes    Often    Always    Not applicable

10、Nurses provided information about the appropriate dietary.

Never    Occasionally    Sometimes    Often    Always    Not applicable

1  
2  
3  
4 **11、 Nurses provided information about disease recovery.**

5  Never  Occasionally  Sometimes  Often  Always  Not applicable

7 **12、 Nurses provided health information through multiple routes.**

8  
9  Never  Occasionally  Sometimes  Often  Always  Not applicable

11 **13、 Nurses provided relevant instructions before implementing medical procedures.**

12  
13  Never  Occasionally  Sometimes  Often  Always  Not applicable

15 **14、 Nurses treated me patiently.**

16  
17  Never  Occasionally  Sometimes  Often  Always

19 **15、 Nurses treated me with respect.**

20  
21  Never  Occasionally  Sometimes  Often  Always

23 **16、 Nurses' behaviors made me feel cared for.**

24  
25  Never  Occasionally  Sometimes  Often  Always

27 **17、 Nurses helped me manage the anxiety, stress, fears I had about my illness.**

28  
29  Never  Occasionally  Sometimes  Often  Always

31 **18、 Nurses were proficient in venipuncture procedures.**

32  
33  Never  Occasionally  Sometimes  Often  Always  Not applicable

35 **19、 Nurses were proficient in other nursing procedures, such as intramuscular injection, hypodermic injection, change of dressing, etc.**

36  
37  Never  Occasionally  Sometimes  Often  Always  Not applicable

41 **20、 Nurses made an inspection tour of the ward.**

42  
43  Never  Occasionally  Sometimes  Often  Always

45 **21、 Nurses monitored my vital signs timely.**

46  
47  Never  Occasionally  Sometimes  Often  Always  Not applicable

49 **22、 Nurses monitored the process of drug treatment.**

50  
51  Never  Occasionally  Sometimes  Often  Always  Not applicable

53 **23、 Nurses could recognize my health issues on time.**

54  
55  Never  Occasionally  Sometimes  Often  Always  Not applicable

57 **24、 Nurses could come and see me in time after pressing the call button.**

58  
59  Never  Occasionally  Sometimes  Often  Always  Not applicable

1  
2  
3  
4 **25、 Nurses dealt with my requests promptly.**

5  Never  Occasionally  Sometimes  Often  Always  Not applicable

7 **26、 Nurses responded to my suggestions or complaints seriously.**

8  
9  Never  Occasionally  Sometimes  Often  Always  Not applicable

11 **27、 Nurses could handle in time when my condition experienced changes.**

12  
13  Never  Occasionally  Sometimes  Often  Always  Not applicable

15 **28、 Nurses informed me about how to prevent the risk events, such as falling and dropping**  
16 **from the bed.**

17  
18  Never  Occasionally  Sometimes  Often  Always

20 **29、 Nurses clearly introduced the use of safety protection equipment, such as the emergency**  
21 **call button in the toilet.**

22  
23  Never  Occasionally  Sometimes  Often  Always

25 **30、 Nurses verified my identify when performing nursing procedures.**

26  
27  Never  Occasionally  Sometimes  Often  Always  Not applicable

29 **31、 Nurses applied hand disinfection before performing nursing procedures.**

30  
31  Never  Occasionally  Sometimes  Often  Always  Not applicable

33 **32、 Nurses provided protective measures when performing nursing procedures in private body**  
34 **parts.**

35  
36  Never  Occasionally  Sometimes  Often  Always  Not applicable

38 **33、 Nurses treated my information confidentially.**

39  
40  Never  Occasionally  Sometimes  Often  Always

## How does overall hospital satisfaction relate to patient experience with nursing care? a cross-sectional study

**Xiao CHEN, Yuxia ZHANG, Wei QIN, Jingxian Yu, Zhenghong YU, Zheng ZHEN**

**Corresponding Author:** Yuxia Zhang, RN, PhD, FAAN, Nursing Department, Zhongshan Hospital of Fudan University. Address: No.180, Fenglin road, Shanghai, People's Republic of China. Telephone: +86 13816881925. Fax number: 64041990. Email: [zhang.yx@aliyun.com](mailto:zhang.yx@aliyun.com)

This study is a cross-sectional survey and is reported according to the 'The Strengthening the Reporting of Observational Studies in Epidemiology (STROBE) Statement for reporting observational studies' obtained from the EQUATOR Network website.

| Item                  | STROBE description                                                                                                              | Reported on pages |
|-----------------------|---------------------------------------------------------------------------------------------------------------------------------|-------------------|
| 1. Title and abstract | (a) Indicate the study's design with a commonly used term in the title or the abstract                                          | 1                 |
|                       | (b) Provide in the abstract an informative and balanced summary of what was done and what was found                             | 1                 |
| 2. Background         | Explain the scientific background and rationale for the investigation being reported                                            | 2-3               |
| 3. Objectives         | State specific objectives, including any prespecified hypotheses                                                                | 3                 |
| 4. Study design       | Present key elements of study design early in the paper                                                                         | 4                 |
| 5. Setting            | Describe the setting, locations, and relevant dates, including periods of recruitment, exposure, follow-up, and data collection | 4                 |
| 6. Participants       | Give the eligibility criteria, and the sources and methods of selection of participants                                         | 4                 |
| 7. Variables          | Clearly define all outcomes, exposures, potential confounders, and effect modifiers. Give diagnostic criteria, if applicable    | 5                 |

| Item                       | STROBE description                                                                                                                                                                                                                                                                                                                         | Reported on pages |
|----------------------------|--------------------------------------------------------------------------------------------------------------------------------------------------------------------------------------------------------------------------------------------------------------------------------------------------------------------------------------------|-------------------|
| 8. Data sources            | For each variable of interest, give sources of data and details of methods of assessment. Describe comparability of assessment methods if there is more than one group                                                                                                                                                                     | 5                 |
| 9. Bias                    | Describe any efforts to address potential sources of bias                                                                                                                                                                                                                                                                                  | 4,7               |
| 10. Study size             | Explain how the study size was arrived at                                                                                                                                                                                                                                                                                                  | 4                 |
| 11. Quantitative variables | Explain how quantitative variables were handled in the analyses. If applicable, describe which groupings were chosen and why                                                                                                                                                                                                               | 7                 |
| 12. Statistical methods    | (a) Describe all statistical methods, including those used to control for confounding<br>(b) Describe any methods used to examine subgroups and interactions<br>(c) Explain how missing data were addressed<br>(d) If applicable, describe analytical methods taking account of sampling strategy<br>(e) Describe any sensitivity analyses | 7                 |
| 13. Participants           | (a) Report numbers of individuals at each stage of study—eg numbers potentially eligible, examined for eligibility, confirmed eligible<br>(b) Give reasons for non-participation at each stage<br>(c) Consider use of a flow diagram                                                                                                       | 4                 |
| 14. Descriptive data       | (a) Give characteristics of study participants (eg demographic, clinical, social) and information on exposures and potential confounders<br>(b) Indicate number of participants with missing data for each variable of interest                                                                                                            | Table 1           |



| Item                 | STROBE description                                                                                                                                                                                                                                                                                                                                                                                            | Reported on pages |
|----------------------|---------------------------------------------------------------------------------------------------------------------------------------------------------------------------------------------------------------------------------------------------------------------------------------------------------------------------------------------------------------------------------------------------------------|-------------------|
| 15. Outcome data     | Report numbers of outcome events or summary measures                                                                                                                                                                                                                                                                                                                                                          | Table 2           |
| 16. Main results     | (a) Give unadjusted estimates and, if applicable, confounder-adjusted estimates and their precision (eg, 95% confidence interval). Make clear which confounders were adjusted for and why they were included<br>(b) Report category boundaries when continuous variables were categorized<br>(c) If relevant, consider translating estimates of relative risk into absolute risk for a meaningful time period | 8                 |
| 17. Other analyses   | Report other analyses done-eg analyses of subgroups and interactions, and sensitivity analyses                                                                                                                                                                                                                                                                                                                | Figure 2; 9       |
| 18. Key results      | Summarise key results with reference to study objectives                                                                                                                                                                                                                                                                                                                                                      | 9-11              |
| 19. Limitations      | Discuss limitations of the study, taking into account sources of potential bias or imprecision. Discuss both direction and magnitude of any potential bias                                                                                                                                                                                                                                                    | 11                |
| 20. Interpretation   | Give a cautious overall interpretation of results considering objectives, limitations, multiplicity of analyses, results from similar studies, and other relevant evidence                                                                                                                                                                                                                                    | 9-11              |
| 21. Generalisability | Discuss the generalisability (external validity) of the study results                                                                                                                                                                                                                                                                                                                                         | 11                |
| 22. Funding          | Give the source of funding and the role of the funders for the present study and, if applicable, for the original study on which the present article is based                                                                                                                                                                                                                                                 | Title page        |
